1 **Loss of Nuclear DNA ligase III Can Revert PARP Inhibitor Resistance in BRCA1-deficient**  
2 **Cells by Increasing DNA Replication Stress**

3 Mariana Paes Dias<sup>1,12</sup>, Vivek Tripathi<sup>2,13</sup>, Ingrid van der Heijden<sup>1,12,13</sup>, Ke Cong<sup>3</sup>, Eleni-Maria Manolika<sup>2</sup>,  
4 Panagiotis Galanos<sup>4</sup>, Jinhyuk Bhin<sup>1,5,12</sup>, Ewa Gogola<sup>1,12</sup>, Stefano Annunziato<sup>1,12</sup>, Cor Lieftink<sup>5</sup>, Miguel  
5 Andújar-Sánchez<sup>6</sup>, Marieke van de Ven<sup>7</sup>, Sanjiban Chakrabarty<sup>8,9</sup>, Roderick L. Beijersbergen<sup>5</sup>, Jirina  
6 Bartkova<sup>4,10</sup>, Sven Rottenberg<sup>1,11</sup>, Sharon Cantor<sup>3</sup>, Jiri Bartek<sup>4,10</sup>, Arnab Ray Chaudhuri<sup>2,\*</sup> and Jos  
7 Jonkers<sup>1,12\*</sup>

8 <sup>1</sup>Division of Molecular Pathology, The Netherlands Cancer Institute, Amsterdam, The Netherlands

9 <sup>2</sup>Department of Molecular Genetics, Erasmus MC Cancer Institute, Erasmus University Medical Center,  
10 Rotterdam, The Netherlands

11 <sup>3</sup>Department of Molecular, Cell and Cancer Biology, University of Massachusetts Medical School,  
12 Worcester, MA, USA

13 <sup>4</sup>Genome Integrity Unit, Danish Cancer Society Research Center, Copenhagen, Denmark

14 <sup>5</sup>Division of Molecular Carcinogenesis, The Netherlands Cancer Institute, Amsterdam, The Netherlands

15 <sup>6</sup>Pathology Department, Complejo Hospt. Univ. Insular Materno Infantil, Las Palmas, Gran Canaria,  
16 Spain

17 <sup>7</sup>Mouse Clinic for Cancer and Aging (MCCA), Preclinical Intervention Unit, The Netherlands Cancer  
18 Institute, Amsterdam, The Netherlands

19 <sup>8</sup>Department of Cell and Molecular Biology, Manipal School of Life Sciences, Manipal Academy of  
20 Higher Education, Karnataka, India

21 <sup>9</sup>Center for DNA Repair and Genome Stability, Manipal Academy of Higher Education, Karnataka, India

22 <sup>10</sup>Karolinska Institutet, Department of Medical Biochemistry and Biophysics, Division of Genome  
23 Biology, Science for Life Laboratory, Stockholm, Sweden

24 <sup>11</sup>Institute of Animal Pathology, Vetsuisse Faculty, University of Bern, Bern, Switzerland

25 <sup>12</sup>Cancer Genomics Netherlands, OncoCode Institute, Amsterdam 1066CX, The Netherlands

26 <sup>13</sup>These authors contributed equally

\*correspondence: [a.raychaudhuri@erasmusmc.nl](mailto:a.raychaudhuri@erasmusmc.nl) (A.R.C); [j.jonkers@nki.nl](mailto:j.jonkers@nki.nl) (J.J)

27 **SUMMARY:**

28 Inhibitors of poly(ADP-ribose) (PAR) polymerase (PARPi) have entered the clinic for the treatment of  
29 homologous recombination (HR)-deficient cancers. Despite the success of this approach, preclinical and  
30 clinical research with PARPi has revealed multiple resistance mechanisms, highlighting the need for  
31 identification of novel functional biomarkers and combination treatment strategies. Functional genetic  
32 screens performed in cells and organoids that acquired resistance to PARPi by loss of 53BP1, identified  
33 loss of LIG3 as an enhancer of PARPi toxicity in BRCA1-deficient cells. Enhancement of PARPi toxicity  
34 by LIG3 depletion is dependent on BRCA1 deficiency but independent of the loss of 53BP1 pathway.  
35 Mechanistically, we show that LIG3 is required for PARPi-induced fork acceleration in BRCA1-deficient  
36 cells and that LIG3 loss increases fork asymmetry. Furthermore, LIG3 depletion in BRCA1-deficient cells  
37 results in an increase in ssDNA gaps behind the replication forks, resulting in accumulation of  
38 chromosomal abnormalities. We also report that high expression of LIG3 in patients with invasive breast  
39 cancer correlates in with poorer overall survival, rendering LIG3 as a potential therapeutic target for  
40 enhancing PARPi sensitivity.

41 **KEYWORDS:** PARP inhibitor, DNA Ligase III, BRCA1, drug resistance, replication stress, ssDNA

## 42 INTRODUCTION:

43 Defects in DNA repair result in genome instability and thereby contribute to the development and  
44 progression of cancer. Alterations in high-fidelity DNA repair genes lead to a greater reliance on  
45 compensatory error-prone repair pathways for cellular survival. This does not only result in the  
46 accumulation of tumor-promoting mutations, but also provides cancer-specific vulnerabilities that can be  
47 exploited for targeted cancer therapy. The first example of such targeted approach was the use of  
48 poly(ADP-ribose) polymerase (PARP) inhibitors (PARPi) in the treatment of *BRCA1* or *BRCA2* deficient  
49 tumors defective in the error-free repair of DNA double-strand breaks (DSBs) through homologous  
50 recombination (HR) (Bryant et al., 2005; Farmer et al., 2005).

51 PARP1, which is the main target for PARPi is involved in various cellular processes, including the  
52 sensing of DNA single-strand breaks (SSBs), repair of DNA DSBs, stabilization of replication forks (RFs),  
53 chromatin remodeling (reviewed by Ray Chaudhuri and Nussenzweig 2017) and the sensing of unligated  
54 Okazaki fragments during DNA replication (Hanzlikova et al., 2018). Upon DNA damage, PARP1 is  
55 rapidly recruited to sites of DNA damage where it post-translationally modifies substrate proteins by  
56 synthesizing poly(ADP-ribose) (PAR) chains in a process known as poly(ADP-ribosyl)ation (PARylation).  
57 During this process, PARP1 itself is a target of PARylation and the resulting PAR chains serve as a  
58 platform for the recruitment of downstream repair factors. AutoPARylation of PARP1 also enhances its  
59 release from DNA, which is essential for various DNA repair processes (Pascal and Ellenberger, 2015).

60 Initially, it was proposed that PARPi act through catalytic inhibition of PARP1, which prevents  
61 efficient repair of SSBs resulting in RF collapse and subsequent generation of DSBs during DNA  
62 replication (Lupo and Trusolino, 2014). However, later studies have demonstrated that several PARPi  
63 also trap PARP1 onto chromatin, resulting in the collapse of RFs that hit trapped PARP1 (Helleday, 2011;  
64 Murai et al., 2012, 2014). PARPi-treated *BRCA1/2*-defective cells can only employ error-prone repair to  
65 resolve the DSBs caused by RF collapse, resulting in accumulation of chromosomal aberrations and cell  
66 death by mitotic catastrophe (Lupo and Trusolino, 2014). Successful clinical trials have resulted in the  
67 recent approval of different PARPi for treatment of patients with *BRCA1/2*-mutant ovarian and breast  
68 cancers (Pilié et al., 2019). Moreover, antitumor activity of PARPi has been observed across multiple  
69 other cancer types, such as prostate and gastrointestinal cancers (Pilié et al., 2019).

70 Despite the success of this approach, multiple mechanisms of resistance to PARPi have been  
71 identified. Preclinical studies have shown that PARPi resistance can be induced by upregulation of the  
72 P-glycoprotein drug efflux transporter (Evers et al., 2008; Rottenberg et al., 2008), PARP1

73 downregulation/inactivation (Murai et al., 2012; Pettitt et al., 2013), mutations that abolish PARP1  
74 trapping (Pettitt et al., 2018), and loss of the PAR glycohydrolase (PARG) responsible for PAR  
75 degradation (Gogola et al., 2018; Pascal and Ellenberger, 2015). Sensitivity to PARPi resistance may  
76 also be reduced by mechanisms that restore RF protection in the absence of BRCA1/2 (Lee et al., 2018;  
77 Ray Chaudhuri et al., 2016; Rondinelli et al., 2017).

78 The best-studied mechanisms of PARPi resistance in BRCA1/2-deficient cells involve restoration  
79 of HR activity via re-activation of BRCA1/2 function or via loss of factors that govern DSB end-protection  
80 in BRCA1-deficient cells. HR restoration due to re-established BRCA1/2 function has been observed in  
81 patients with PARPi-resistant breast cancer (Afghahi et al., 2017; Barber et al., 2013) and ovarian cancer  
82 (Barber et al., 2013; Edwards et al., 2008; Kondrashova et al., 2017). Restoration of HR via loss of DSB  
83 end-protection in *BRCA1*-associated tumors may be achieved by loss of 53BP1, RIF1, REV7, or  
84 components of the shieldin complex and the CST complex (Boersma et al., 2015; Bouwman et al., 2010;  
85 Bunting et al., 2010; Chapman et al., 2013; Dev et al., 2018; Escribano-Díaz et al., 2013; Feng et al.,  
86 2013; Ghezraoui et al., 2018; Gupta et al., 2018; Jaspers et al., 2013; Noordermeer et al., 2018; Xu et  
87 al., 2015; Zimmermann et al., 2013). Altogether, these studies underscore the high selective pressure for  
88 PARPi-treated tumors to restore HR for survival.

89 Drug resistance often comes at a fitness cost due to collateral vulnerabilities which can be  
90 exploited to improve therapy response. PARG inactivation causes PARPi resistance but results in  
91 increased sensitivity to ionizing radiation (IR) and temozolomide (Amé et al., 2009; Gogola et al., 2018).  
92 BRCA1-deficient tumors that acquired resistance to PARPi due to loss of the 53BP1 pathway have also  
93 been shown to become more radiosensitive (Barazas et al., 2019). In a similar fashion, loss of the NHEJ  
94 factors LIG4 or XRCC4 results in resistance to the DNA-damaging agent topotecan in ATM-deficient cells  
95 at the cost of increased radiosensitivity (Balmus et al., 2019). However, not much is known about the  
96 vulnerabilities that can be exploited to re-sensitize BRCA1- deficient PARPi resistant tumors to PARPi  
97 treatments again. In this study, we identified DNA ligase III (LIG3), a known SSBs and DSBs repair factor  
98 (Caldecott et al., 1996; Cappelli et al., 1997; Simsek et al., 2011; Wang et al., 2005), as a collateral  
99 vulnerability of BRCA1-deficient cells with acquired PARPi resistance due to loss of DSB end-protection.  
100 We show that loss of LIG3 enhances the toxicity of PARPi in these cells, rendering LIG3 as a potential  
101 therapeutic target to overcome PARPi resistance.

102 **RESULTS:**

103 **Functional Genetic Dropout Screens Identify LIG3 as a Modulator of PARPi-resistance in *Brca1*<sup>-/-</sup>**  
104 **;*Trp53bp1*<sup>-/-</sup> cells**

105 To identify acquired vulnerabilities in BRCA1-deficient cells which developed PARPi resistance via  
106 BRCA1-independent restoration of HR, we carried out functional genetic dropout screens in two types of  
107 cellular models deficient for BRCA1, p53 and 53BP1. The first screen was performed in two-dimensional  
108 (2D) *Brca1*<sup>-/-</sup>;*Trp53*<sup>-/-</sup>;*Trp53bp1*<sup>-/-</sup> mouse embryonic stem cells (mESCs). The second screen was  
109 performed in the three-dimensional (3D) BRCA1-deficient organoid line ORG-KB1P4.R1, derived from a  
110 *K14cre;Brca1*<sup>F/F</sup>;*Trp53*<sup>F/F</sup> (KB1P) mouse mammary tumor that acquired resistance to PARPi *in vivo* due  
111 to loss of 53BP1 function (Duarte et al., 2018). Both cellular models were transduced with a lentiviral  
112 library of 1,976 short hairpin RNA (shRNA) constructs targeting 391 DNA damage response (DDR)  
113 related genes (Gogola et al., 2018; Xu et al., 2015). Cells were either mock treated or selected for 3  
114 weeks in the presence of the PARPi olaparib (Figure 1A). Olaparib selection was carried out at a  
115 concentration which did not affect the viability of resistant cells, but lethal to the corresponding PARPi-  
116 sensitive cells. Sequencing of the shRNAs in the surviving cells revealed a specific and reproducible  
117 dropout of hairpins targeting *Lig3* in the olaparib-treated cell population (Figure 1B and S1A, Table S1).  
118 Furthermore, *Lig3* was observed to be the only common significant dropout gene identified across both  
119 screens (Figure 1C). We therefore decided to investigate further whether LIG3 would constitute a useful  
120 target for the reversion of PARPi resistance.

121 **Depletion of LIG3 Increases the Sensitivity to PARPi, Independently of 53BP1 Loss**

122 To validate the findings of our shRNA screens, we carried out viability assays using shRNA-mediated  
123 depletion of LIG3 in ORG-KB1P4.R1 organoids. LIG3 depletion significantly increased the sensitivity to  
124 olaparib, when compared to the parental cells (Figure 1D and S1B). Increased sensitivity to olaparib was  
125 also observed upon depletion of LIG3 in PARPi-resistant KB1P-177a5 cells, derived from an independent  
126 PARPi-resistant KB1P tumor with 53BP1 loss (Jaspers et al. 2013) (Figure S1C,D). These results confirm  
127 that loss of LIG3 results in re-sensitization of BRCA1 and 53BP1 co-deficient cells to PARPi. Furthermore,  
128 depletion of LIG3 also reverted the reduced sensitivity to olaparib in KB1P mammary tumor cells depleted  
129 of REV7, a downstream partner of 53BP1 (Boersma et al., 2015; Xu et al., 2015) (Figure S1E,F),  
130 indicating that LIG3-mediated resistance is not exclusive for 53BP1-deficient cells.

131 We next asked whether LIG3 depletion would also increase the PARPi sensitivity of treatment-  
132 naïve BRCA1-deficient tumor cells with functional 53BP1. To test this, we used ORG-KB1P4.N1  
133 organoids and KB1P-G3 cells derived from PARPi-naïve KB1P tumors (Duarte et al., 2018; Jaspers et  
134 al., 2013). In both cellular models, shRNA-mediated depletion of LIG3 resulted in increased sensitivity to  
135 olaparib (Figure 1E and S1B,G,H). Depletion of LIG3 also resulted in increased sensitivity to olaparib in  
136 the human *BRCA1*-mutant breast cancer cell line SUM149PT (Figure S1I,J). Importantly, our results were  
137 not restricted to olaparib, as LIG3 depletion also increased the sensitivity of KB1P cells to the PARPi  
138 talazoparib and veliparib (Figure S1K).

### 139 **PARPi Sensitization of Cells by LIG3 Depletion is Dependent on BRCA1 Status**

140 Next, we sought to investigate whether the increased PARPi sensitivity of LIG3-depleted cells is BRCA1-  
141 dependent. shRNA-mediated depletion of LIG3 in BRCA-proficient ORG-KPM.1 organoids, derived from  
142 *K14cre;Trp53<sup>F/F</sup>* (KP) mouse mammary tumors (Duarte et al., 2018), slightly increased the sensitivity to  
143 PARPi, but only at a high concentration of 10 $\mu$ M (Figure 1F and S2A). To corroborate these data, we  
144 validated the effect of LIG3 depletion in *R26<sup>creERT2</sup>;Brca1<sup>SCo/-</sup>;Trp53<sup>-/-</sup>;Trp53bp1<sup>-/-</sup>* mESCs, in which  
145 addition of 4-hydroxytamoxifen (4OHT) induces BRCA1 inactivation via Cre-mediated deletion of the  
146 remaining *Brca1* allele (Figure 1G) (Bouwman et al. 2010). Since these mESCs are deficient for p53 and  
147 53BP1, no difference in olaparib sensitivity was observed between the BRCA1-proficient (-4OHT) and  
148 BRCA1-deficient (+4OHT) cells (Figure 1H). Also shRNA-mediated depletion of LIG3 did not affect cell  
149 proliferation in untreated BRCA1-proficient and BRCA1-deficient mESCs. However, LIG3 depletion did  
150 result in increased olaparib sensitivity in BRCA1-deficient cells, compared to unmodified cells (Figure1H  
151 and S2B,C,D).To investigate whether the effect was independent of the loss of 53BP1, we repeated this  
152 experiment in *R26<sup>creERT2</sup>;Brca1<sup>SCo/-</sup>;Trp53<sup>-/-</sup>* mESCs. Also, in these 53BP1-proficient mESCs, depletion  
153 of LIG3 increased the sensitivity to PARPi in BRCA1-deficient cells but not BRCA1-proficient cells (Figure  
154 S2B,E-G).

155 Additionally, we tested depletion of LIG3 in three isogenic human TERT-immortalized retinal  
156 pigment epithelial (RPE1) cell lines with engineered loss of *TP53* (RPE1-SKO), *TP53+BRCA1* (RPE1-  
157 DKO), or *TP53+BRCA1+TP53BP1* (RPE1-TKO). In line with the data observed in mouse cells, shRNA-  
158 mediated depletion of LIG3 did not increase sensitivity to olaparib in RPE1-SKO cells, but rendered  
159 RPE1-TKO cells as sensitive to olaparib as the RPE1-DKO cells (Figure1I and S2H). In addition,  
160 depletion of LIG3 further increased sensitivity of RPE1-DKO cells to olaparib. Taken together, our data  
161 show that LIG3 depletion enhances the toxicity of PARPi in BRCA1-deficient cells which acquired

162 resistance due to loss of DSB end-protection, indicating that LIG3 is an important modulator of the PARPi  
163 response specifically in BRCA1-deficient cells.

### 164 **Resistance to PARPi in 53BP1-deficient KB1P cells is Mediated by Nuclear LIG3**

165 The *LIG3* gene encodes both mitochondrial and nuclear proteins (Lakshmipathy and Campbell,  
166 1999). Importantly, mitochondrial LIG3 is essential for cellular viability as it ensures mtDNA integrity  
167 (Puebla-Osorio et al., 2006). Consequently, complete deletion of *Lig3* results in cellular death and early  
168 embryonic lethality in mice, whereas nuclear LIG3 has been shown to be dispensable for cell viability  
169 (Simsek et al., 2011). We therefore asked whether the increased PARPi sensitivity of LIG3-depleted  
170 BRCA1-deficient cells resulted from loss of LIG3 activity in the nucleus or in the mitochondria. To test  
171 this, we generated nuclear *Lig3* knockout cells which only express the mitochondrial form of LIG3. To  
172 this end, we used 53BP1-deficient KB1P-177a5 mouse tumor cells in which we introduced an ATG>CTC  
173 mutation in the internal translation initiation site that is required for expression of the nuclear LIG3 isoform  
174 but does not affect expression of mitochondrial LIG3 (Figure 2A) (Lakshmipathy and Campbell, 1999).  
175 Next, we analyzed LIG3 protein expression in different single cell clones with heterozygous or  
176 homozygous ATG>CTC mutations in *Lig3* (Figure 2B). Immunofluorescence analysis of LIG3 in two  
177 homozygous clones (A3 and F5) and one heterozygous clone (B1) revealed that parental KB1P-177a5  
178 cells and the heterozygous clone displayed LIG3 staining in both nucleus and mitochondria, whereas the  
179 homozygous clones exhibited loss of nuclear LIG3 expression (Figure 2C). Finally, we investigated  
180 whether the nuclear mutants of LIG3 displayed increased sensitivity to PARPi. Long-term clonogenic  
181 assays revealed that the nuclear LIG3-deficient KB1P-177a5 clones A3 and F5 showed similar sensitivity  
182 to olaparib as PARPi-sensitive KB1P-G3 cells, whereas the PARPi-resistant parental KB1P-177a5 cells  
183 and the heterozygous B1 clone displayed comparable resistance to olaparib (Figure 2D). Taken together,  
184 our data show that nuclear LIG3 mediates PARPi resistance in 53BP1-deficient KB1P cells.

### 185 **PARP1 Trapping Contributes to PARPi Toxicity in LIG3-Depleted cells**

186 Most PARPi, in addition to blocking the catalytic activity of PARP1, also induce toxic PARP1-DNA  
187 complexes as result of their trapping capacity (Murai et al., 2012, 2014). We therefore decided to test if  
188 enhanced PARPi sensitivity induced by LIG3 depletion is mediated by PARP1 trapping or by loss of  
189 PARP1 catalytic activity, which can be mimicked by genetic deletion of *Parp1*. We therefore generated  
190 *Parp1* knockout clones in *R26<sup>creERT2</sup>;Brca1<sup>SCo</sup>;<sup>-/-</sup>;Trp53<sup>-/-</sup>;Trp53bp1<sup>-/-</sup>* mESCs using two different sgRNAs

191 and selected two clones for further experiments (Figure S2I). Immunoblot analysis showed that both  
192 *Parp1* knockout clones displayed decreased levels of PAR, confirming functional loss of PARP1 (Figure  
193 S2J). siRNA-mediated depletion of LIG3 did not affect the viability of either BRCA1-proficient (-4OHT) or  
194 BRCA1-deficient (+4OHT) *Parp1* knockout clones (Figure 3A), indicating that the sensitization to PARPi  
195 observed upon LIG3 depletion relies on PARPi-mediated PARP1 trapping rather than catalytic  
196 inactivation. It is important to note that PARP1 accounts for more than 80% of PAR synthesis, while  
197 PARP2, another member of the ADP-ribosyltransferase family, accounts for the remainder (Amé et al.,  
198 1999). In addition, PARP2 has been reported to sufficient for the recruitment of downstream factors  
199 (Hanzlikova et al., 2017). Although our results could be explained by a compensatory mechanism  
200 mediated by PARP2, *PARP1* knockout clones did show a significant decrease in PARylation levels  
201 (Figure S2J) and no increased expression of PARP2 (Figure S2K).

202 Next, we tested whether depletion of LIG3 influences the levels of PARP1 trapping on chromatin.  
203 To this end, we measured PARP1 association kinetics by quantification of GFP-PARP1 levels at UV  
204 laser-induced DNA damage sites in U2OS cells. The intensities of laser tracks in cells expressing GFP-  
205 PARP1 were quantified every 1 min for 30 min post irradiation. As expected, olaparib treatment resulted  
206 in an increase in chromatin associated PARP1 after 30 min, when compared to untreated cells (Figure  
207 3B, C). siRNA-mediated depletion of LIG3 alone resulted in a slight increase in chromatin-associated  
208 PARP1 in untreated U2OS cells, and in a more profound increase in PARP1 accumulation in olaparib-  
209 treated cells (Figure 3B, C and S2L). We further verified these findings by quantifying the levels of  
210 chromatin-bound PARP1 in BRCA1-deficient KB1P-G3 cells and isogenic KB1P-G3B1 cells reconstituted  
211 with human BRCA1 (Barazas et al., 2019), using a previously described trapping assay (Figure 3D)  
212 (Gogola et al., 2018; Murai et al., 2012). Immunoblot analysis showed an olaparib-dependent  
213 accumulation of PARP1 in chromatin fractions, which further increased upon treatment with the alkylating  
214 agent methyl methanesulfonate (MMS) (Figure 3E and S2M). Although we didn't reach statistical  
215 significance, we observed a consistent tendency for increased PARP1 trapping upon siRNA-mediated  
216 depletion of LIG3 in all treatment conditions, which seemed to be most prominent in BRCA1-deficient  
217 KB1P-G3 cells than BRCA1-proficient KB1P-G3B1 cells (Figure 3E and S2M). Together, these results  
218 suggest that the increased PARPi sensitivity observed upon LIG3 depletion in BRCA1 deficient cells is  
219 mediated by enhanced PARPi-driven PARP1 trapping.

## 220 **LIG3 is Required for PARPi-induced Increase in Fork Speed in BRCA1-Deficient Cells**



221 Our data indicates that the increase in sensitivity to PARPi arising from LIG3 depletion is independent of  
222 the loss of DSB end-protection, and therefore independent of HR status. Hence, we hypothesized that  
223 depletion of LIG3 would not affect HR levels in cells which have restored this pathway due to loss of  
224 53BP1. To test this hypothesis, we carried out RAD51 ionizing radiation-induced foci (RAD51 IRIF) in our  
225 mouse tumor-derived cell lines as a read-out of functional HR status (Xu et al., 2015). As expected,  
226 BRCA1-deficient KB1P-G3 cells had significantly less IRIF per cell than the BRCA1-proficient KP-3.33  
227 cells, while the BRCA1- and 53BP1-deficient KB1P-177a5 cells displayed increased numbers of IRIF  
228 compared with KB1P-G3 (Figure S3A). Moreover, neither shRNA-mediated depletion of LIG3 nor deletion  
229 of LIG3 nuclear isoform led to a significant reduction of RAD51 IRIF (Figure S3A), corroborating our  
230 hypothesis that the sensitivity observed in LIG3-depleted cells is not a result of decreased HR in these  
231 cells.

232 Data from recent studies indicates that LIG3 could be involved in ligation of okazaki fragments,  
233 as part of PARP1 and XRCC1-dependent “backup” pathway (Arakawa and Iliakis, 2015; Hanzlikova et  
234 al., 2018). Therefore, we next investigated whether LIG3 localizes to sites of DNA replication marked by  
235 5-ethynyl-2'-deoxyuridine (EdU) incorporation, in the absence of DNA damage induction. To test this, we  
236 performed proximity ligation-based assays (PLA) to detect LIG3 binding to replicated DNA (Mukherjee et  
237 al., 2019; Taglialatela et al., 2017), in BRCA1-proficient KP-3.33, BRCA1-reconstituted KB1P-G3B1 cells,  
238 and in BRCA1-deficient KB1P-G3 cells. Interestingly, untreated KB1P-G3 cells showed significantly  
239 higher levels of LIG3-EdU PLA foci than KP-3.33 or KB1P-G3B1 cells (Figure 4A, B and S3B, and C). We  
240 next tested if LIG3 localization at replication sites is affected by PARPi treatments which would trap  
241 PARP1 at replication forks. Therefore, we carried out LIG3-EdU PLA after incubating cells with olaparib  
242 for 2hr. Quantification of LIG3-EdU PLA foci revealed that PARPi treatment did not induce any increase  
243 in the number of foci in KB1P-G3B1 cells. In contrast, BRCA1-deficient KB1P-G3 cells displayed a striking  
244 increase in the number of PLA foci after olaparib treatment (Figure 4A and S3B).

245 We next investigated whether LIG3 localization at replication sites is affected by the PARG  
246 inhibitor (PARGi) PDDX-001, which is known to increase PAR levels and also result in the trapping of  
247 PARP1 on chromatin (Gogola et al., 2018; Hanzlikova et al., 2018; James et al., 2016). We therefore  
248 carried out LIG3-EdU PLA after incubating cells with PARGi for 30 min. Similar to olaparib-treated cells,  
249 PARGi-treated BRCA1-deficient cells showed a strong increase in the number of LIG3-EdU PLA foci,  
250 while no significant changes were observed in KP-3.33 cells (Figure 4B and S3C). Co-localization of LIG3  
251 at EdU-marked replication sites after PARGi treatment was also verified qualitatively by LIG3  
252 immunostaining in KP-3.33, KB1P-G3 cells and KB1P-177a5 cells (Figure S3D). Taken together, our

253 data strongly suggest that LIG3 localization at replication sites is enhanced in BRCA1-deficient cells,  
254 which is further increased by PARP1 trapping, rather than changes in PARylation levels.

255         Since LIG3 seems to play a role at replication sites in BRCA1-deficient conditions, we asked  
256 whether depletion of LIG3 would affect RF progression in untreated and PARPi-treated BRCA1-deficient  
257 cells. To test this, we performed DNA fiber assay in BRCA1-deficient KB1P-G3 and BRCA1-reconstituted  
258 KB1P-G3B1 cells. Cells were pre-incubated with low concentrations of (0.5 $\mu$ M) olaparib for 80 min,  
259 followed by sequential labelling with CldU (red) and IdU (green) for 20 mins each in the presence of  
260 olaparib (Figure 4C). Progression was measured by tract lengths of CldU and IdU. Analysis of RF speeds  
261 revealed no significant increase in BRCA1-proficient KB1P-G3B1 cells after olaparib treatment (Figure  
262 4D, S3E and F). In contrast, BRCA1-deficient KB1P-G3 cells exhibited an increase in RF speed upon  
263 olaparib treatment, in line with previous work (Maya-Mendoza et al., 2018). Surprisingly, while depletion  
264 of LIG3 did not affect RF speed in untreated cells, it significantly suppressed the PARPi-induced increase  
265 in fork speed in KB1P-G3 cells (Figure 4D, S3E and F). We hypothesized that this might be due to an  
266 increase in RF stress rather than a return to normal fork progression. Therefore, we next analyzed RF  
267 symmetry in BRCA1-proficient and-deficient cells by measuring sister fork-ratio (Figure 4C and E). While  
268 BRCA1-proficient KB1P-G3B1 cells did not show any significant differences in fork symmetry across  
269 conditions, depletion of LIG3 induced a significant increase in sister fork asymmetry in BRCA1-deficient  
270 KB1P-G3 cells exposed to olaparib (Figure 4E). These data corroborate our hypothesis that the lack of  
271 PARPi-induced fork acceleration observed in LIG3-depleted BRCA1-deficient cells is a result of  
272 persistent RF stalling upon loss of LIG3 rather than a rescue of fork speed. Furthermore, as observed in  
273 KB1P-G3 cells, olaparib treatments in BRCA1- and 53BP1-deficient KB1P-177a5 cells increased fork  
274 speed, which was rescued by depletion of LIG3 (Figure 4F, S3F and G). Interestingly, depletion of LIG3  
275 alone in KB1P-177a5 cells resulted in fork asymmetry, which was further enhanced by olaparib treatment  
276 (Figure 4G). To confirm our results, we also performed DNA fiber assays in BRCA1- and 53BP1-depleted  
277 hTERT-RPE1 TKO cells and measured fork speed (Figure S3H, I and J). As observed in KB1P-177a5  
278 cells, treatment with olaparib resulted in an increase in fork speed, which was reversed by depletion of  
279 LIG3 (Figure S3J), corroborating the previous findings (Figure 4F and S3G). Overall, our results support  
280 the notion that the PARPi-induced increase in RF progression in BRCA1-deficient cells is mediated by  
281 LIG3. Depletion of LIG3 in BRCA1-deficient cells exposed to PARPi leads to slower and asymmetric  
282 forks, which could result in increased genomic instability.

283 **LIG3 Depletion Reverts PARPi Resistance by increasing ssDNA Gaps but not DSBs**

284 PARPi sensitivity in BRCA-deficient cells could result from an accumulation of replication-  
285 associated single-stranded DNA (ssDNA) gaps (Cong et al., 2019). Since LIG3 could be involved in  
286 ligation of okazaki fragments, we asked whether LIG3 depletion would result in an increase of replication  
287 associated ssDNA gaps. To test this, we cultured KB1P-G3B1, KB1P-G3 and KB1P-177a5 mouse tumor  
288 cells in medium supplemented with BrdU for 48hr, followed by a 2hr-treatment with olaparib, and  
289 quantification of native BrdU intensity by quantitative image-based cytometry (QIBC) (Toledo et al., 2013)  
290 (Figure 5A). No changes in ssDNA levels were observed in BRCA1-proficient KB1P-G3B1 cells,  
291 independently of olaparib treatment or LIG3 depletion (Figure 5B and S4A). However, treatments with  
292 olaparib resulted in a significant increase in ssDNA levels in the S-phase cells of BRCA1-deficient KB1P-  
293 G3 cells but not in the BRCA1- and 53BP1-deficient KB1P-177a5 cells (Figure 5B, C, S4A and B).  
294 Interestingly, LIG3-depletion alone resulted in an increase in ssDNA levels in both KB1P-G3 and KB1P-  
295 177-a5 cells, independently of olaparib treatment (Figure 5B, C, S4A and B). To confirm our results, we  
296 have also carried out DNA fiber assay in hTERT-RPE1 TKO cells and measured RF track length in  
297 presence of olaparib, followed by incubation with the S1 nuclease, which digests ssDNA (Quinet et al.,  
298 2016, 2017) (Figure S3H, I and K). If nascent PARPi-induced ssDNA regions are within the labeled  
299 replication tracts, shorter visible CldU/IdU tracks will be observed (Cong et al., 2019). Incubation with S1  
300 nuclease in untreated cells did not substantially decrease the size of the tracks of LIG3-depleted cells  
301 (Figure S3K). On the contrary, S1 nuclease treatment in olaparib-treated cells resulted in shorter tracks  
302 in LIG3-depleted cells in comparison with unmodified cells (Figure S3K). These results suggest that the  
303 ssDNA gaps formed upon depletion of LIG3 are in the vicinity of RF.

304 Next, to test if the increase of ssDNA observed was indeed in the vicinity of replication forks, we used  
305 electron microscopy (EM) to visualize the fine architecture of replication intermediates in KB1P-G3 cells  
306 after 2hr-treatment with olaparib. In untreated conditions, a minority of the DNA molecules displayed 1-  
307 2 ssDNA gaps behind the fork, whereas olaparib treatment enhanced the percentage of molecules  
308 displaying 1-2 ssDNA gaps as well as resulted in molecules displaying 3 and more ssDNA gaps.  
309 Depletion of LIG3 alone resulted in similar numbers of internal ssDNA gaps as those of unmodified cells  
310 treated with olaparib, while olaparib treatment of LIG3-depleted cells resulted in a further increase  
311 specifically in molecules with more than 3 gaps (Figure 5D, E). Together, these results suggest that LIG3  
312 is required for suppression of ssDNA gaps in BRCA1-deficient cells.

313 Next, we tested whether increased ssDNA gaps behind the forks upon LIG3-depletion resulted in  
314 increased genomic instability in KB1P-G3B1, KB1P-G3 and KB1P-177a5 mouse tumor cells. We  
315 analyzed chromosomal aberrations in metaphase spreads after treatment with olaparib for 2hr followed

316 by a 6hr recovery. As expected, chromosome aberrations were unaltered in KB1P-G3B1 cells,  
317 independently of LIG3 depletion or olaparib treatment (Figure 5F and S4C). In contrast, olaparib  
318 treatment resulted in increased numbers of chromosomal aberrations in unmodified KB1P-G3 cells,  
319 which was further enhanced by LIG3 depletion and olaparib treatment (Figure 5F and S4C). KB1P-177a5  
320 cells did not show an increase in chromosomal aberrations upon olaparib treatment, as anticipated.  
321 However, depletion of LIG3 resulted in a surge in chromosome aberrations comparable to olaparib-  
322 treated KB1P-G3 cells, independently of olaparib treatment (Figure 5F and S4C). Altogether, our results  
323 indicate that LIG3 depletion results in an increase in chromosomal aberrations in BRCA1-deficient cells,  
324 suggesting that LIG3 is responsible for maintaining genomic stability in *Brca1*<sup>-/-</sup> and *Brca1*<sup>-/-</sup>;*Trp53bp1*<sup>-/-</sup>  
325 cells.

326 Next, we questioned if the increase in ssDNA gaps can ultimately result in an increase in DSBs,  
327 which then would result in the observed increase in genomic instability. To this, end we performed pulsed-  
328 field gel electrophoresis (PFGE) in KB1P-G3B1, KB1P-G3 and KB1P-177a5 mouse tumor cells treated  
329 with 0.5 $\mu$ M olaparib for 2 hr and released for 4 or 14 hr. While KB1P-G3B1 cells only showed an increase  
330 in DSBs after 14hr release, KB1P-G3 cells already displayed higher levels of DSBs after 4h release,  
331 which was maintained until 14hr post release (Figure S4D). We did not observe any changes in DSB  
332 levels in the resistant KB1P-177a5 cells at any of the tested time-points (Figure S4D). Depletion of LIG3  
333 did not increase the levels of DSBs in any of the tested cell lines or conditions (Figure S4D), indicating  
334 that the increase in genomic instability is not a result from DSBs generation.

### 335 **LIG3 Depletion Increases Efficacy of Olaparib Against BRCA1-deficient Mammary Tumors in Mice**

336 Our previous results established that LIG3 is a modulator of PARPi-response *in vitro*. To test whether our  
337 results could be recapitulated *in vivo*, we performed shRNA-mediated depletion of LIG3 in PARPi-naïve  
338 KB1P4.N1 organoids (BRCA1-deficient) and PARPi-resistant KB1P4.R1 organoids (BRCA1- and 53BP1-  
339 deficient) (Figure 6A). The modified organoid lines were transplanted into the mammary fat pad of  
340 syngeneic wild-type mice. Upon tumor outgrowth, mice were treated with olaparib or vehicle for 28  
341 consecutive days, and mice were sacrificed when tumors progressed to a volume of  $\geq 1500$  mm<sup>3</sup>. LIG3  
342 depletion did not affect tumor growth and all cohorts of vehicle-treated mice showed comparable survival  
343 (Figure 6B, C). In contrast, LIG3 depletion significantly enhanced the anticancer efficacy of olaparib,  
344 resulting in increased survival of olaparib-treated mice bearing KB1P4.N1+shLIG3 tumors, compared to  
345 olaparib-treated mice with KB1P4.N1+shscr tumors (Figure 6B). Importantly, LIG3 depletion also  
346 resensitized the PARPi-resistant KB1P4.R1 tumors to olaparib. Whereas olaparib-treated and vehicle-

347 treated mice with KB1P4.R1 tumors showed comparable survival, olaparib treatment significantly  
348 prolonged the survival of mice bearing KB1P4.R1+shLIG3 tumors (Figure 6C). Together, these data show  
349 that LIG3 also modulates PARPi response *in vivo*.

### 350 **LIG3 Expression Correlates with Overall Survival in Human Breast Cancer Patients**

351 To assess the clinical relevance of LIG3, we turned to The Cancer Genome Atlas (TCGA) ([https://tcga-](https://tcga-data.nci.nih.gov)  
352 [data.nci.nih.gov](https://tcga-data.nci.nih.gov)). Analysis of LIG3 expression in the TCGA invasive breast cancer patient cohort  
353 revealed that low expression of LIG3 is associated with increased overall survival (Figure 6D, E).  
354 Importantly, the correlation of LIG3 with survival rates was not associated with breast cancer subtype, as  
355 separation between triple-negative and luminal breast cancer cohorts still resulted in association of high  
356 LIG3 expression with poorer overall survival (Figure S5). In contrast, analysis of the TCGA serous ovarian  
357 cancer patient cohort, did not show a significant association of LIG3 expression with overall survival.  
358 However, immunohistochemical analysis of LIG3 expression in sections of treatment-naïve tumors from  
359 a cohort of 51 women with high-grade serous ovarian carcinoma (Moudry et al., 2016) revealed that,  
360 although LIG3 protein was expressed at normal levels in a majority of tumor cells in the biopsies, a  
361 substantial proportion of samples contained areas displaying aberrant expression of LIG3. Interestingly,  
362 26 (51%) and 7 (13.7%) of the 51 cases showed LIG3 overexpression in areas corresponding to >10%  
363 and >20% of the tumor, respectively (Figure 6F, G). Conversely, LIG3-negative areas were observed in  
364 small proportion of biopsies, with 2 (3.9%) and 4 (7.8%) of the 51 ovarian cancers displaying loss of LIG3  
365 in areas corresponding to >10% and >20% of the tumor, respectively (Figure 6F, G). These observations  
366 reveal that LIG3 expression is heterogeneous within and across serous ovarian cancers, which might  
367 result in selective expansion of LIG3 overexpressing clones during PARPi treatment and thereby  
368 contribute to intratumoral and inter-patient differences in response to PARPi therapy.

369 **DISCUSSION**

370 Molecular alterations that render cells resistant to targeted therapies may also cause synthetic  
371 dependencies, which can be exploited to design rational combination therapies. In this study, we used  
372 shRNA screens to identify synthetic dependencies of BRCA1-deficient cells which acquired resistance to  
373 PARPi treatment by restoration of HR due to loss 53BP1. We identified LIG3 as a critical suppressor of  
374 PARPi toxicity in BRCA1-deficient cells with restoration of HR due to loss 53BP1. Loss of LIG3 also  
375 enhances PARPi sensitivity of HR-deficient BRCA1-deficient cells with intact 53BP1, indicating that the  
376 role of LIG3 in BRCA1-deficient cells is independent of their 53BP1 status.

377 Nuclear LIG3 is involved in XRCC1-mediated repair of SSBs by BER (Caldecott et al., 1996;  
378 Cappelli et al., 1997). Prior studies have reported that loss of XRCC1 renders cells sensitive to PARPi  
379 independently of *BRCA* status (Horton et al., 2014; Lord et al., 2008; Murai et al., 2012). In contrast, our  
380 data show that LIG3 loss only enhances PARPi sensitivity in BRCA1-deficient cells, indicating that this  
381 effect of LIG3 depletion is independent of its role in BER.

382 PARPi treatment not only inhibits PARP1 activity, but also results in trapping of PARP1 protein  
383 on DNA (Murai et al., 2012). The presence of these PARP1-DNA complexes could pose a blockage for  
384 travelling replication machinery and result in cytotoxicity specifically in HR-deficient cells (Noordermeer  
385 and van Attikum, 2019). Our data show that PARPi-mediated trapping of PARP1 is indeed critical for the  
386 enhancement of PARPi sensitivity by LIG3 loss in BRCA1-deficient tumor cells, as genetic inactivation of  
387 PARP1 did not affect cell viability upon LIG3 depletion. Loss of LIG3 in cells also resulted in retention of  
388 PARP1 on damaged chromatin, which was enhanced upon PARPi treatment, more specifically in  
389 BRCA1-deficient cells. This suggests that LIG3 could be important for the rapid turnover of PARP1 from  
390 damaged chromatin. In the absence of LIG3, high levels of chromatin-trapped PARP1 in BRCA1-deficient  
391 tumor cells could cause replication blockage and thereby promote PARPi toxicity in these cells. In support  
392 of this notion, our data show that LIG3 is recruited to sites of DNA replication in BRCA1-deficient cells  
393 under conditions where PARP1 is trapped on the DNA.

394 PARP1 has recently been implicated in restraining replication fork (RF) speed in cells (Maya-  
395 Mendoza et al., 2018). PARPi-induced increase in fork speed and ensuing ssDNA exposure has also  
396 been proposed to underlie the toxic effects of these inhibitors in BRCA1-deficient cells (Cong et al., 2019;  
397 Maya-Mendoza et al., 2018). We indeed observed an increase of fork speed and ssDNA in BRCA1-  
398 deficient cells treated with low doses of PARPi. However, PARPi-resistant BRCA1/53BP1 double-mutant

399 cells still displayed increased fork speeds but no marked ssDNA exposure upon treatment with low-dose  
400 PARPi. These data suggest that, in contrast to the perceived idea, increase of fork speed and ssDNA  
401 exposure can be uncoupled and the former is not causally related to PARPi sensitivity of BRCA1-deficient  
402 cells.

403 PARP1 has also been identified as a sensor for unligated okazaki fragments during unperturbed  
404 DNA replication (Hanzlikova et al., 2018). Loss of LIG1, which is the main DNA ligase responsible for  
405 okazaki fragment ligation, results in increased fork speed without activating the DNA damage response  
406 (DDR) (Maya-Mendoza et al., 2018). This is suggestive of a backup pathway that governs RF integrity in  
407 the absence of LIG1. In line with this, LIG3 has been suggested to be involved in LIG1-independent  
408 ligation of okazaki fragments during DNA replication (Arakawa and Iliakis, 2015). Consistent with this  
409 hypothesis, our study shows that loss of LIG3 rescues the increased fork progression rates observed in  
410 PARPi-treated BRCA1-deficient cells. Additionally, exposure of LIG3-depleted BRCA1-deficient cells to  
411 PARPi induces a strong increase in sister fork asymmetry, which could be due to increased fork stalling  
412 caused by PARPi-mediated PARP1 trapping. Together, our data suggest that the PARPi-induced  
413 increase in fork speed observed in BRCA1-deficient cells might be driven by a LIG3-dependent  
414 mechanism for bypass of chromatin-trapped PARP1 lesions by the replisome (Figure 7). Impairment of  
415 this bypass mechanism by LIG3 loss could enhance PARPi-induced fork stalling, resulting in increased  
416 genome instability and PARPi sensitivity (Figure 7). Interestingly, we also observe significantly enhanced  
417 ssDNA exposure and ssDNA gaps in replicated DNA upon loss of LIG3 in untreated BRCA1 deficient  
418 cells, which also correlates with increased genome instability in these cells. Addition of PARPi results in  
419 a further increase in ssDNA exposure, ssDNA gaps and genome instability. In aggregate, our findings  
420 are most compatible with a model in which loss of a LIG3-dependent lesion bypass mechanism, in  
421 BRCA1-deficient cells, causes frequent replication fork stalling followed by defective bypass of trapped  
422 PARP1 lesions on parental DNA. This in turn could result in genomic instability and hypersensitization to  
423 PARPi treatment (Figure 7).

424 Our findings may have therapeutic implications, as LIG3 depletion also increases the efficacy of  
425 PARPi *in vivo*, resulting in prolonged survival of mice bearing PARPi-sensitive BRCA1-deficient or  
426 PARPi-resistant BRCA1/53BP1 double-deficient mammary tumors. Furthermore, high expression of  
427 LIG3 in invasive breast cancer patients correlates in with poor overall survival, suggesting that LIG3 could  
428 possibly be targeted in these cancers. Pharmacological inhibition of LIG3 might therefore be a potential  
429 strategy to combat resistance to PARPi. Taken together, our findings establish loss of LIG3 as a potent  
430 enhancer of PARPi synthetic lethality in BRCA1-deficient cells, irrespective of their HR status, and

431 provide mechanistic insights into the role of LIG3 in restraining replication stress and genome instability  
432 induced by BRCA1 loss.



433 **ACKNOWLEDGMENTS**

434 We would like to thank Peter Bouwman and for kindly sharing the *Brca1<sup>SCo/-</sup>;Trp53<sup>-/-</sup>* mouse embryonic  
435 stem cells, Hanneke van der Gulden for technical assistance, and Sylvie Noordermeer and Dan Durocher  
436 for kindly sharing the RPE1-TERT cells lines. We are also grateful to Giorgos Pappas (DCRC) for his  
437 contribution to the micro-irradiation experiments. We thank the members of the Preclinical Intervention  
438 Unit of the Mouse Clinic for Cancer and Ageing (MCCA) at the NKI for their technical support with the  
439 animal studies, and we thank the NKI core facilities: Digital Microscopy facility, Genomics Core facility  
440 and Animal facility for their excellent service. This work was supported by grants from the European  
441 Union's Horizon 2020 research and innovation program under the Marie Skłodowska-Curie grant  
442 agreement No. 722729; the Dutch Research Council (NWO, VICI 91814643); the Danish Cancer Society  
443 (R204-A12617-B153); the Danish Council for Independent Research (DFF-7016-00313); the Novo  
444 Nordisk Foundation (synergy grant no. 16854); the Swedish Research Council (VR-MH 2014-46602-  
445 117891-30); the Swedish Cancer Foundation (170176); the Danish National Research Foundation  
446 (project CARD, DNRF 125); the Dutch Cancer Society (KWF grant 11008 to ARC); and the Onco  
447 Institute, which is partly financed by the KWF.

448 **AUTHOR CONTRIBUTIONS**

449 Conceptualization, M.P.D. and J.J.; Methodology, M.P.D., I.v.d.H. and A.R.C.; Investigation, M.P.D.,  
450 I.v.d.H., V.T, E.M, K.C, P.G., S.A., J.Bartkova and M.A.S.; Supervision of *in vivo* experiments, M.v.d.V;  
451 Data analysis, C.L. and R.B.; Bioinformatic analysis, J.Bh. and S.Ch. Writing of original draft, review &  
452 editing – M.P.D., A.R.C. and J.J.; Supervision, E.G., S.R., S.C., J. Bartek, A.R.C and J.J..

453 **DECLARATION OF INTERESTS**

454 The authors declare no potential conflicts of interest.

455 **REFERENCES**

- 456 Afghahi, A., Timms, K.M., Vinayak, S., Jensen, K.C., Kurian, A.W., Carlson, R.W., Chang, P.-J.,  
457 Schackmann, E., Hartman, A.-R., Ford, J.M., et al. (2017). Tumor BRCA1 Reversion Mutation Arising  
458 during Neoadjuvant Platinum-Based Chemotherapy in Triple-Negative Breast Cancer Is Associated  
459 with Therapy Resistance. *Clin. Cancer Res.* 23, 3365–3370.
- 460 Amé, J.C., Rolli, V., Schreiber, V., Niedergang, C., Apiou, F., Decker, P., Muller, S., Höger, T.,  
461 Ménissier-de Murcia, J., and De Murcia, G. (1999). PARP-2, a novel mammalian DNA damage-  
462 dependent poly(ADP-ribose) polymerase. *J. Biol. Chem.* 274, 17860–17868.
- 463 Amé, J.C., Fouquerel, E., Gauthier, L.R., Biard, D., Boussin, F.D., Dantzer, F., de Murcia, G., and  
464 Schreiber, V. (2009). Radiation-induced mitotic catastrophe in PARG-deficient cells. *J. Cell Sci.* 122,  
465 1990–2002.
- 466 Arakawa, H., and Iliakis, G. (2015). Alternative Okazaki Fragment Ligation Pathway by DNA Ligase III.  
467 *Genes (Basel)*. 6, 385–398.
- 468 Balmus, G., Pilger, D., Coates, J., Demir, M., Sczaniecka-Clift, M., Barros, A.C., Woods, M., Fu, B.,  
469 Yang, F., Chen, E., et al. (2019). ATM orchestrates the DNA-damage response to counter toxic non-  
470 homologous end-joining at broken replication forks. *Nat. Commun.* 10.
- 471 Barazas, M., Annunziato, S., Pettitt, S.J., de Krijger, I., Ghezraoui, H., Roobol, S.J., Lutz, C., Frankum,  
472 J., Song, F.F., Brough, R., et al. (2018). The CST Complex Mediates End Protection at Double-Strand  
473 Breaks and Promotes PARP Inhibitor Sensitivity in BRCA1-Deficient Cells. *Cell Rep.* 23, 2107–2118.
- 474 Barazas, M., Gasparini, A., Huang, Y., Küçükosmanoğlu, A., Annunziato, S., Bouwman, P., Sol, W.,  
475 Kersbergen, A., Proost, N., de Korte-Grimmerink, R., et al. (2019). Radiosensitivity Is an Acquired  
476 Vulnerability of PARPi-Resistant BRCA1-Deficient Tumors. *Cancer Res.* 79, 452–460.
- 477 Barber, L.J., Sandhu, S., Chen, L., Campbell, J., Kozarewa, I., Fenwick, K., Assiotis, I., Rodrigues,  
478 D.N., Reis Filho, J.S., Moreno, V., et al. (2013). Secondary mutations in BRCA2 associated with clinical  
479 resistance to a PARP inhibitor. *J. Pathol.* 229, 422–429.
- 480 Bartkova, J., Hořejší, Z., Koed, K., Krämer, A., Tort, F., Zieger, K., Guldborg, P., Sehested, M.,  
481 Nesland, J.M., Lukas, C., et al. (2005). DNA damage response as a candidate anti-cancer barrier in  
482 early human tumorigenesis. *Nature* 434, 864–870.
- 483 Boersma, V., Moatti, N., Segura-Bayona, S., Peuscher, M.H., van der Torre, J., Wevers, B. a, Orthwein,  
484 A., Durocher, D., and Jacobs, J.J.L. (2015). MAD2L2 controls DNA repair at telomeres and DNA breaks  
485 by inhibiting 5' end resection. *Nature* 521, 537–540.
- 486 Bouwman, P., Aly, A., Escandell, J.M., Pieterse, M., Bartkova, J., van der Gulden, H., Hiddingh, S.,  
487 Thanasoula, M., Kulkarni, A., Yang, Q., et al. (2010). 53BP1 loss rescues BRCA1 deficiency and is  
488 associated with triple-negative and BRCA-mutated breast cancers. *Nat. Struct. Mol. Biol.* 17, 688–695.
- 489 Bouwman, P., van der Gulden, H., van der Heijden, I., Drost, R., Klijn, C.N., Prasetyanti, P., Pieterse,  
490 M., Wientjens, E., Seibler, J., Hogervorst, F.B.L., et al. (2013). A High-Throughput Functional  
491 Complementation Assay for Classification of BRCA1 Missense Variants. *Cancer Discov.* 3, 1142–1155.
- 492 Brinkman, E.K., Chen, T., Amendola, M., and van Steensel, B. (2014). Easy quantitative assessment of

- 493 genome editing by sequence trace decomposition. *Nucleic Acids Res.* *42*, e168–e168.
- 494 Brinkman, E.K., Kousholt, A.N., Harmsen, T., Leemans, C., Chen, T., Jonkers, J., and van Steensel, B.  
495 (2018). Easy quantification of template-directed CRISPR/Cas9 editing. *Nucleic Acids Res.* *46*, e58–  
496 e58.
- 497 Bryant, H.E., Schultz, N., Thomas, H.D., Parker, K.M., Flower, D., Lopez, E., Kyle, S., Meuth, M.,  
498 Curtin, N.J., and Helleday, T. (2005). Specific killing of BRCA2-deficient tumours with inhibitors of  
499 poly(ADP-ribose) polymerase. *Nature* *434*, 913–917.
- 500 Bunting, S.F., Call??n, E., Wong, N., Chen, H.T., Polato, F., Gunn, A., Bothmer, A., Feldhahn, N.,  
501 Fernandez-Capetillo, O., Cao, L., et al. (2010). 53BP1 inhibits homologous recombination in brca1-  
502 deficient cells by blocking resection of DNA breaks. *Cell* *141*, 243–254.
- 503 Caldecott, K.W., Aoufouchi, S., Johnson, P., and Shall, S. (1996). XRCC1 polypeptide interacts with  
504 DNA polymerase  $\beta$  and possibly poly (ADP-ribose) polymerase, and DNA ligase III is a novel molecular  
505 “nick-sensor” in vitro. *Nucleic Acids Res.* *24*, 4387–4394.
- 506 Cappelli, E., Taylor, R., Cevasco, M., Abbondandolo, A., Caldecott, K., and Frosina, G. (1997).  
507 Involvement of XRCC1 and DNA ligase III gene products in DNA base excision repair. *J. Biol. Chem.*  
508 *272*, 23970–23975.
- 509 Ceccaldi, R., Liu, J.C., Amunugama, R., Hajdu, I., Petalcorin, M.I.R., Connor, K.W.O.,  
510 Konstantinopoulos, P.A., Elledge, S.J., Boulton, S.J., Yusufzai, T., et al. (2015). Homologous  
511 recombination-deficient tumors are hyper- dependent on POLQ-mediated repair. *Nature* *518*, 258–262.
- 512 Chapman, J.R., Barral, P., Vannier, J.B., Borel, V., Steger, M., Tomas-Loba, A., Sartori, A.A., Adams,  
513 I.R., Batista, F.D., and Boulton, S.J. (2013). RIF1 Is Essential for 53BP1-Dependent Nonhomologous  
514 End Joining and Suppression of DNA Double-Strand Break Resection. *Mol. Cell* *49*, 858–871.
- 515 Cong, K., Kousholt, A.N., Peng, M., Panzarino, N.J., Ting, W., Lee, C., Nayak, S., Krais, J., Calvo, J.,  
516 Bere, M., et al. (2019). PARPi synthetic lethality derives from replication-associated single-stranded  
517 DNA gaps. *BioRxiv*.
- 518 Cong, L., Ran, F.A., Cox, D., Lin, S., Barretto, R., Habib, N., Hsu, P.D., Wu, X., Jiang, W., Marraffini,  
519 L.A., et al. (2013). Multiplex Genome Engineering Using CRISPR/Cas Systems. *Science* (80-. ). *339*,  
520 819–823.
- 521 Cornacchia, D., Dileep, V., Quivy, J.P., Foti, R., Tili, F., Santarella-Mellwig, R., Antony, C., Almouzni,  
522 G., Gilbert, D.M., and Bonanno, S.B.C. (2012). Mouse Rif1 is a key regulator of the replication-timing  
523 programme in mammalian cells. *EMBO J.* *31*, 3678–3690.
- 524 Dev, H., Chiang, T.-W.W., Lescale, C., de Krijger, I., Martin, A.G., Pilger, D., Coates, J., Sczaniecka-  
525 Clift, M., Wei, W., Ostermaier, M., et al. (2018). Shieldin complex promotes DNA end-joining and  
526 counters homologous recombination in BRCA1-null cells. *Nat. Cell Biol.* *20*, 954–965.
- 527 Drost, R., Dhillon, K.K., Van Der Gulden, H., Van Der Heijden, I., Brandsma, I., Cruz, C.,  
528 Chondronasiou, D., Castroviejo-Bermejo, M., Boon, U., Schut, E., et al. (2016). BRCA1185delAG  
529 tumors may acquire therapy resistance through expression of RING-less BRCA1. *J. Clin. Invest.* *126*,  
530 2903–2918.
- 531 Duarte, A.A., Gogola, E., Sachs, N., Barazas, M., Annunziato, S., R de Ruiter, J., Velds, A., Blatter, S.,  
532 Houthuijzen, J.M., van de Ven, M., et al. (2018). BRCA-deficient mouse mammary tumor organoids to

- 533 study cancer-drug resistance. *Nat. Methods* 15, 134–140.
- 534 Edwards, S.L., Brough, R., Lord, C.J., Natrajan, R., Vatcheva, R., Levine, D.A., Boyd, J., Reis-Filho,  
535 J.S., and Ashworth, A. (2008). Resistance to therapy caused by intragenic deletion in BRCA2. *Nature*  
536 451, 1111–1115.
- 537 Escribano-Díaz, C., Orthwein, A., Fradet-Turcotte, A., Xing, M., Young, J.T.F., Tkáč, J., Cook, M.A.,  
538 Rosebrock, A.P., Munro, M., Canny, M.D., et al. (2013). A Cell Cycle-Dependent Regulatory Circuit  
539 Composed of 53BP1-RIF1 and BRCA1-CtIP Controls DNA Repair Pathway Choice. *Mol. Cell* 49, 872–  
540 883.
- 541 Evers, B., Drost, R., Schut, E., de Bruin, M., van der Burg, E., Derksen, P.W.B., Holstege, H., Liu, X.,  
542 van Drunen, E., Beverloo, H.B., et al. (2008). Selective Inhibition of BRCA2-Deficient Mammary Tumor  
543 Cell Growth by AZD2281 and Cisplatin. *Clin. Cancer Res.* 14, 3916–3925.
- 544 Farmer, H., Nuala, M., Lord, C., Tutt, A., Johnson, D., Richardson, T., and Santarosa, M.  
545 (2005). Targeting the DNA repair defect in BRCA mutant cells as a therapeutic strategy. *Nature* 434,  
546 917–921.
- 547 Feng, L., Fong, K.W., Wang, J., Wang, W., and Chen, J. (2013). RIF1 counteracts BRCA1-mediated  
548 end resection during DNA repair. *J. Biol. Chem.* 288, 11135–11143.
- 549 Follenzi, A., Ailles, L.E., Bakovic, S., Geuna, M., and Naldini, L. (2000). Gene transfer by lentiviral  
550 vectors is limited by nuclear translocation and rescued by HIV-1 pol sequences. *Nat. Genet.* 25, 217–  
551 222.
- 552 Ghezraoui, H., Oliveira, C., Becker, J.R., Bilham, K., Moralli, D., Anzilotti, C., Fischer, R., Deobagkar-  
553 Lele, M., Sanchiz-Calvo, M., Fueyo-Marcos, E., et al. (2018). 53BP1 cooperation with the REV7–  
554 shieldin complex underpins DNA structure-specific NHEJ. *Nature* 560, 122–127.
- 555 Gogola, E., Duarte, A.A., de Ruiter, J.R., Wiegant, W.W., Schmid, J.A., de Bruijn, R., James, D.I.,  
556 Guerrero Llobet, S., Vis, D.J., Annunziato, S., et al. (2018). Selective Loss of PARG Restores  
557 PARylation and Counteracts PARP Inhibitor-Mediated Synthetic Lethality. *Cancer Cell* 33, 1078-  
558 1093.e12.
- 559 Gupta, R., Somyajit, K., Narita, T., Maskey, E., Stanlie, A., Kremer, M., Typas, D., Lammers, M.,  
560 Mailand, N., Nussenzweig, A., et al. (2018). DNA Repair Network Analysis Reveals Shieldin as a Key  
561 Regulator of NHEJ and PARP Inhibitor Sensitivity. *Cell* 173, 972-988.e23.
- 562 Hanzlikova, H., Gittens, W., Krejcikova, K., Zeng, Z., and Caldecott, K.W. (2017). Overlapping roles for  
563 PARP1 and PARP2 in the recruitment of endogenous XRCC1 and PNKP into oxidized chromatin.  
564 *Nucleic Acids Res.* 45, 2546–2557.
- 565 Hanzlikova, H., Kalasova, I., Demin, A.A., Pennicott, L.E., Cihlarova, Z., and Caldecott, K.W. (2018).  
566 The Importance of Poly(ADP-Ribose) Polymerase as a Sensor of Unligated Okazaki Fragments during  
567 DNA Replication. *Mol. Cell* 71, 319-331.e3.
- 568 Helleday, T. (2011). The underlying mechanism for the PARP and BRCA synthetic lethality: Clearing up  
569 the misunderstandings. *Mol. Oncol.* 5, 387–393.
- 570 Horton, J.K., Stefanick, D.F., Prasad, R., Gassman, N.R., Kedar, P.S., and Wilson, S.H. (2014). DNA  
571 Damage and Repair Base Excision Repair Defects Invoke Hypersensitivity to PARP Inhibition.
- 572 Ianevski, A., Giri, A.K., and Aittokallio, T. (2020). SynergyFinder 2.0: visual analytics of multi-drug

- 573 combination synergies. *Nucleic Acids Res.* **48**, W488–W493.
- 574 James, D.I., Smith, K.M., Jordan, A.M., Fairweather, E.E., Griffiths, L.A., Hamilton, N.S., Hitchin, J.R.,  
575 Hutton, C.P., Jones, S., Kelly, P., et al. (2016). First-in-class chemical probes against poly(ADP-ribose)  
576 glycohydrolase (PARG) inhibit DNA repair with differential pharmacology to olaparib. *ACS Chem. Biol.*  
577 **11**, 3179–3190.
- 578 Jaspers, J.E., Kersbergen, A., Boon, U., Sol, W., van Deemter, L., Zander, S.A., Drost, R., Wientjens,  
579 E., Ji, J., Aly, A., et al. (2013). Loss of 53BP1 Causes PARP Inhibitor Resistance in *Brca1* -Mutated  
580 Mouse Mammary Tumors. *Cancer Discov.* **3**, 68–81.
- 581 Kondrashova, O., Nguyen, M., Shield-Artin, K., Tinker, A. V, Teng, N.N.H., Harrell, M.I., Kuiper, M.J.,  
582 Ho, G.-Y., Barker, H., Jasin, M., et al. (2017). Secondary Somatic Mutations Restoring RAD51C and  
583 RAD51D Associated with Acquired Resistance to the PARP Inhibitor Rucaparib in High-Grade Ovarian  
584 Carcinoma. *Cancer Discov.* **7**, 984–998.
- 585 Lakshminpathy, U., and Campbell, C. (1999). The human DNA ligase III gene encodes nuclear and  
586 mitochondrial proteins. *Mol. Cell. Biol.* **19**, 3869–3876.
- 587 Lee, S.-B., Segura-Bayona, S., Villamor-Payà, M., Saredi, G., Todd, M.A.M., Attolini, C.S.-O., Chang,  
588 T.-Y., Stracker, T.H., and Groth, A. (2018). Tausled-like kinases stabilize replication forks and show  
589 synthetic lethality with checkpoint and PARP inhibitors. *Sci. Adv.* **4**, eaat4985.
- 590 Li, W., Xu, H., Xiao, T., Cong, L., Love, M.I., Zhang, F., Irizarry, R.A., Liu, J.S., Brown, M., and Liu, X.S.  
591 (2014). MAGeCK enables robust identification of essential genes from genome-scale CRISPR/Cas9  
592 knockout screens. *Genome Biol.* **15**, 554.
- 593 Lord, C.J., McDonald, S., Swift, S., Turner, N.C., and Ashworth, A. (2008). A high-throughput RNA  
594 interference screen for DNA repair determinants of PARP inhibitor sensitivity. *DNA Repair (Amst)*. **7**,  
595 2010–2019.
- 596 Love, M.I., Huber, W., and Anders, S. (2014). Moderated estimation of fold change and dispersion for  
597 RNA-seq data with DESeq2. *Genome Biol.* **15**, 550.
- 598 Lupo, B., and Trusolino, L. (2014). Inhibition of poly(ADP-ribosylation) in cancer: old and new  
599 paradigms revisited. *Biochim. Biophys. Acta* **1846**, 201–215.
- 600 Mateos-Gomez, P.A., Gong, F., Nair, N., Miller, K.M., Lazzarini-Denchi, E., and Sfeir, A. (2015).  
601 Mammalian polymerase  $\theta$  promotes alternative NHEJ and suppresses recombination. *Nature* **518**,  
602 254–257.
- 603 Maya-Mendoza, A., Moudry, P., Merchut-Maya, J.M., Lee, M., Strauss, R., and Bartek, J. (2018). High  
604 speed of fork progression induces DNA replication stress and genomic instability. *Nature* **559**, 279–284.
- 605 McQuin, C., Goodman, A., Chernyshev, V., Kametsky, L., Cimini, B.A., Karhohs, K.W., Doan, M.,  
606 Ding, L., Rafelski, S.M., Thirstrup, D., et al. (2018). CellProfiler 3.0: Next-generation image processing  
607 for biology. *PLOS Biol.* **16**, e2005970.
- 608 Mortusewicz, O., Amé, J.-C., Schreiber, V., and Leonhardt, H. (2007). Feedback-regulated poly(ADP-  
609 ribosylation) by PARP-1 is required for rapid response to DNA damage in living cells. *Nucleic Acids*  
610 *Res.* **35**, 7665–7675.
- 611 Moudry, P., Watanabe, K., Wolanin, K.M., Bartkova, J., Wassing, I.E., Watanabe, S., Strauss, R.,  
612 Troelsgaard Pedersen, R., Oestergaard, V.H., Lisby, M., et al. (2016). TOPBP1 regulates RAD51

- 613 phosphorylation and chromatin loading and determines PARP inhibitor sensitivity. *J. Cell Biol.* 212,  
614 281–288.
- 615 Mukherjee, C., Tripathi, V., Manolika, E.M., Heijink, A.M., Ricci, G., Merzouk, S., de Boer, H.R.,  
616 Demmers, J., van Vugt, M.A.T.M., and Ray Chaudhuri, A. (2019). RIF1 promotes replication fork  
617 protection and efficient restart to maintain genome stability. *Nat. Commun.* 10, 3287.
- 618 Murai, J., Huang, S.Y.N., Das, B.B., Renaud, A., Zhang, Y., Doroshov, J.H., Ji, J., Takeda, S., and  
619 Pommier, Y. (2012). Trapping of PARP1 and PARP2 by clinical PARP inhibitors. *Cancer Res.* 72,  
620 5588–5599.
- 621 Murai, J., Huang, S.Y.N., Renaud, A., Zhang, Y., Ji, J., Takeda, S., Morris, J., Teicher, B., Doroshov,  
622 J.H., and Pommier, Y. (2014). Stereospecific PARP trapping by BMN 673 and comparison with olaparib  
623 and rucaparib. *Mol. Cancer Ther.* 13, 433–443.
- 624 Noordermeer, S.M., and van Attikum, H. (2019). PARP Inhibitor Resistance: A Tug-of-War in BRCA-  
625 Mutated Cells. *Trends Cell Biol.* 29, 820–834.
- 626 Noordermeer, S.M., Adam, S., Setiawati, D., Barazas, M., Pettitt, S.J., Ling, A.K., Olivieri, M., Álvarez-  
627 Quilón, A., Moatti, N., Zimmermann, M., et al. (2018). The shieldin complex mediates 53BP1-  
628 dependent DNA repair. *Nature* 560, 117–121.
- 629 Pascal, J.M., and Ellenberger, T. (2015). The rise and fall of poly(ADP-ribose): An enzymatic  
630 perspective. *DNA Repair (Amst).* 32, 10–16.
- 631 Peng, M., Cong, K., Panzarino, N.J., Nayak, S., Calvo, J., Deng, B., Zhu, L.J., Morocz, M., Hegedus, L.,  
632 Haracska, L., et al. (2018). Opposing Roles of FANCD1 and HLF1 Protect Forks and Restrain  
633 Replication during Stress. *Cell Rep.* 24, 3251–3261.
- 634 Pettitt, S.J., Rehman, F.L., Bajrami, I., Brough, R., Wallberg, F., Kozarewa, I., Fenwick, K., Assiotis, I.,  
635 Chen, L., Campbell, J., et al. (2013). A genetic screen using the PiggyBac transposon in haploid cells  
636 identifies Parp1 as a mediator of olaparib toxicity. *PLoS One* 8, e61520.
- 637 Pettitt, S.J., Krastev, D.B., Brandsma, I., Dréan, A., Song, F., Aleksandrov, R., Harrell, M.I., Menon, M.,  
638 Brough, R., Campbell, J., et al. (2018). Genome-wide and high-density CRISPR-Cas9 screens identify  
639 point mutations in PARP1 causing PARP inhibitor resistance. *Nat. Commun.* 9, 1849.
- 640 Pilié, P.G., Tang, C., Mills, G.B., and Yap, T.A. (2019). State-of-the-art strategies for targeting the DNA  
641 damage response in cancer. *Nat. Rev. Clin. Oncol.* 16, 81–104.
- 642 Puebla-Osorio, N., Lacey, D.B., Alt, F.W., and Zhu, C. (2006). Early Embryonic Lethality Due to  
643 Targeted Inactivation of DNA Ligase III. *Mol. Cell. Biol.* 26, 3935–3941.
- 644 Quinet, A., Martins, D.J., Vessoni, A.T., Biard, D., Sarasin, A., Stary, A., and Menck, C.F.M. (2016).  
645 Translesion synthesis mechanisms depend on the nature of DNA damage in UV-irradiated human cells.  
646 *Nucleic Acids Res.* 44, 5717–5731.
- 647 Quinet, A., Carvajal-Maldonado, D., Lemaçon, D., and Vindigni, A. (2017). DNA Fiber Analysis: Mind  
648 the Gap! In *Methods in Enzymology*, (Academic Press Inc.), pp. 55–82.
- 649 Ray Chaudhuri, A., and Nussenzweig, A. (2017). The multifaceted roles of PARP1 in DNA repair and  
650 chromatin remodelling.
- 651 Ray Chaudhuri, A., Hashimoto, Y., Herrador, R., Neelsen, K.J., Fachinetti, D., Bermejo, R., Cocito, A.,

- 652 Costanzo, V., and Lopes, M. (2012). Topoisomerase I poisoning results in PARP-mediated replication  
653 fork reversal. *Nat. Struct. Mol. Biol.* *19*, 417–423.
- 654 Ray Chaudhuri, A., Callen, E., Ding, X., Gogola, E., Duarte, A.A., Lee, J.-E., Wong, N., Lafarga, V.,  
655 Calvo, J.A., Panzarino, N.J., et al. (2016). Replication fork stability confers chemoresistance in BRCA-  
656 deficient cells. *Nature* *535*, 382–387.
- 657 Rondinelli, B., Gogola, E., Yücel, H., Duarte, A.A., Van De Ven, M., Van Der Sluijs, R.,  
658 Konstantinopoulos, P.A., Jonkers, J., Ceccaldi, R., Rottenberg, S., et al. (2017). EZH2 promotes  
659 degradation of stalled replication forks by recruiting MUS81 through histone H3 trimethylation. *Nat. Cell*  
660 *Biol.* *19*, 1371–1378.
- 661 Rottenberg, S., Jaspers, J.E., Kersbergen, A., van der Burg, E., Nygren, A.O.H., Zander, S.A.L.,  
662 Derksen, P.W.B., de Bruin, M., Zevenhoven, J., Lau, A., et al. (2008). High sensitivity of BRCA1-  
663 deficient mammary tumors to the PARP inhibitor AZD2281 alone and in combination with platinum  
664 drugs. *Proc. Natl. Acad. Sci.* *105*, 17079–17084.
- 665 Rueden, C.T., Schindelin, J., Hiner, M.C., DeZonia, B.E., Walter, A.E., Arena, E.T., and Eliceiri, K.W.  
666 (2017). ImageJ2: ImageJ for the next generation of scientific image data. *BMC Bioinformatics* *18*.
- 667 Sanjana, N.E., Shalem, O., and Zhang, F. (2014). Improved vectors and genome-wide libraries for  
668 CRISPR screening. *Nat. Methods* *11*, 783–784.
- 669 Simsek, D., Furda, A., Gao, Y., Artus, J., Brunet, E., Hadjantonakis, A.-K., Van Houten, B., Shuman, S.,  
670 McKinnon, P.J., and Jasin, M. (2011). Crucial role for DNA ligase III in mitochondria but not in Xrcc1-  
671 dependent repair. *Nature* *471*, 245–248.
- 672 Taglialatela, A., Alvarez, S., Leuzzi, G., Sannino, V., Ranjha, L., Huang, J.-W., Madubata, C., Anand,  
673 R., Levy, B., Rabadan, R., et al. (2017). Restoration of Replication Fork Stability in BRCA1- and  
674 BRCA2-Deficient Cells by Inactivation of SNF2-Family Fork Remodelers. *Mol. Cell* *68*, 414-430.e8.
- 675 Tang, Z., Li, C., Kang, B., Gao, G., Li, C., and Zhang, Z. (2017). GEPIA: A web server for cancer and  
676 normal gene expression profiling and interactive analyses. *Nucleic Acids Res.* *45*, W98–W102.
- 677 Toledo, L.I., Altmeyer, M., Rask, M.-B., Lukas, C., Larsen, D.H., Povlsen, L.K., Bekker-Jensen, S.,  
678 Mailand, N., Bartek, J., and Lukas, J. (2013). ATR Prohibits Replication Catastrophe by Preventing  
679 Global Exhaustion of RPA. *Cell* *155*, 1088–1103.
- 680 Wang, H., Rosidi, B., Perrault, R., Wang, M., Zhang, L., Windhofer, F., and Iliakis, G. (2005). DNA  
681 ligase III as a candidate component of backup pathways of nonhomologous end joining. *Cancer Res.*  
682 *65*, 4020–4030.
- 683 Xu, G., Ross Chapman, J., Brandsma, I., Yuan, J., Mistrik, M., Bouwman, P., Bartkova, J., Gogola, E.,  
684 Warmerdam, D., Barazas, M., et al. (2015). REV7 counteracts DNA double-strand break resection and  
685 affects PARP inhibition. *Nature* *521*, 541–544.
- 686 Yoshimi, K., Kunihiro, Y., Kaneko, T., Nagahora, H., Voigt, B., and Mashimo, T. (2016). ssODN-  
687 mediated knock-in with CRISPR-Cas for large genomic regions in zygotes. *Nat. Commun.* *7*, 10431.
- 688 Zellweger, R., Dalcher, D., Mutreja, K., Berti, M., Schmid, J.A., Herrador, R., Vindigni, A., and Lopes,  
689 M. (2015). Rad51-mediated replication fork reversal is a global response to genotoxic treatments in  
690 human cells. *J. Cell Biol.* *208*, 563–579.
- 691 Zhou, J., Gelot, C., Pantelidou, C., Li, A., Yucel, H., Davis, R.E., Farkkila, A., Kochupurakkal, B., Syed,



692 A., Shapiro, G.I., et al. (2020). Polymerase Theta Inhibition Kills Homologous Recombination Deficient  
693 Tumors. *BioRxiv* 2020.05.23.111658.

694 Zimmermann, M., Lotterberger, F., Buonomo, S.B., Sfeir, A., and de Lange, T. (2013). 53BP1  
695 regulates DSB repair using Rif1 to control 5' end resection. *Science* 339, 700–704.

696

697 **KEY RESOURCES TABLE**

| REAGENT or RESOURCE                                     | SOURCE         | IDENTIFIER     |
|---------------------------------------------------------|----------------|----------------|
| <b>Antibodies</b>                                       |                |                |
| Rabbit polyclonal anti-PARP1                            | Cell Signaling | Cat#9542       |
| Rabbit polyclonal anti-LIG3                             | Sigma-Aldrich  | Cat#HPA006723  |
| Mouse monoclonal anti-LIG3 [1F3]                        | Genetex        | Cat#GTX70143   |
| Rabbit polyclonal anti-53BP1                            | Abcam          | Cat#ab21083    |
| Mouse monoclonal anti-PAR (10H)                         | Millipore      | Cat#AM80       |
| Rabbit polyclonal anti-53BP1                            | Abcam          | Cat#ab21083    |
| Rabbit polyclonal anti-RAD51                            | Abcam          | Cat#ab133534   |
| Rabbit polyclonal anti-PARP2                            | Proteintech    | Cat#55149-1-AP |
| Mouse polyclonal anti-P53                               | Monosan        | Cat#MONX110194 |
| Rat monoclonal anti-BrdU [BU1/75 (ICR1)]                | Abcam          | Cat#ab6326     |
| Mouse monoclonal anti-BrdU (B44)                        | BD             | Cat#347580     |
| Rabbit polyclonal anti- $\alpha/\beta$ -Tubulin         | Cell Signaling | Cat#2148S      |
| Rabbit polyclonal anti-H3                               | Invitrogen     | Cat#PA5-31954  |
| Mouse monoclonal anti- $\beta$ -Actin                   | Sigma          | Cat#A5441      |
| Goat polyclonal anti-rabbit, HRP conjugated             | DAKO           | Cat#P0448      |
| Rabbit polyclonal anti-mouse, HRP conjugated            | DAKO           | Cat#P0260      |
| Goat polyclonal anti-mouse, Alexa Fluor 488-conjugated  | Invitrogen     | Cat#A11001     |
| Goat polyclonal anti-rabbit, Alexa Fluor 488-conjugated | Invitrogen     | Cat#A27034     |
| Goat polyclonal anti-rabbit, Alexa Fluor 568-conjugated | Invitrogen     | Cat#A11011     |

|                                                      |                                           |                   |
|------------------------------------------------------|-------------------------------------------|-------------------|
| Goat polyclonal anti-rat, Alexa Fluor 594-conjugated | Invitrogen                                | Cat#ab150168      |
| Donkey polyclonal anti-rat Cy3                       | Jackson Immuno-Research Laboratories, Inc | Cat#712-166-1530  |
| <b>Biological Samples</b>                            |                                           |                   |
| Human ovarian serous carcinomas                      | (Moudry et al., 2016)                     | N/A               |
| <b>Chemicals, Peptides, and Recombinant Proteins</b> |                                           |                   |
| Olaparib (AZD2281), PARP inhibitor                   | Syncom, Groningen, The Netherlands        | CAS: 763113-22-0  |
| Talazoparib (BMN-673)                                | Selleckchem                               | Cat#S7048         |
| PARG inhibitor                                       | Tocris                                    | PDD 0017273; 5952 |
| Veliparib (ABT-888)                                  | Selleck                                   | Cat#S1004         |
| Methyl methanesulfonate (MMS)                        | Sigma-Aldrich                             | Cat#129925        |
| 4-Hydroxytamoxifen (4-OHT)                           | Sigma-Aldrich                             | Cat#H6278         |
| Alt-R® S.p. Cas9 Nuclease 3NLS                       | IDT                                       | Cat#1081058       |
| S1 nuclease                                          | Invitrogen                                | Cat#18001-016     |
| <b>Critical Commercial Assays</b>                    |                                           |                   |
| Click-iT EdU Alexa Fluor 488 Imaging Kit             | Invitrogen                                | Cat# C10337       |
| MitoTracker™ Red CMXRos                              | Invitrogen                                | Cat#M7512         |
| Subcellular Protein Fractionation Kit                | Thermo Scientific                         | Cat#78840         |
| Cell Titer Blue                                      | Promega                                   | Cat#G8081         |
| PCR Lentivirus Titration Kit                         | Applied Biological Materials              | Cat#LV900         |
| <b>Experimental Models: Cell Lines</b>               |                                           |                   |
| KP-3.33                                              | (Evers et al., 2008)                      | N/A               |
| KB1P-G3                                              | (Jaspers et al., 2013)                    | N/A               |
| KB1P-177a5 (a.k.a. KB1PM5 ola-res)                   | (Jaspers et al., 2013)                    | N/A               |
| ORG-KB1P.N1                                          | (Duarte et al., 2018)                     | N/A               |

|                                                                                                   |                            |                |
|---------------------------------------------------------------------------------------------------|----------------------------|----------------|
| ORG-KB1P.R1                                                                                       | (Duarte et al., 2018)      | N/A            |
| ORG-KPM.1                                                                                         | (Duarte et al., 2018)      | N/A            |
| KB1P-G3B1                                                                                         | (Barazas et al., 2019)     | N/A            |
| KB1P-177a5 #B1 (wt/mut)                                                                           | This paper                 | N/A            |
| KB1P-177a5 #A3 (mut/mut)                                                                          | This paper                 | N/A            |
| KB1P-177a5 #F5 (mut/mut)                                                                          | This paper                 | N/A            |
| <i>Brca1<sup>SCo</sup>-/-;Trp53<sup>-/-</sup></i> mESC                                            | This paper                 | N/A            |
| <i>Brca1<sup>SCo</sup>-/-;Trp53<sup>-/-</sup>;Trp53bp1<sup>-/-</sup></i> mESC                     | This paper                 | N/A            |
| <i>Brca1<sup>SCo</sup>-/-;Trp53<sup>-/-</sup>;Trp53bp1<sup>-/-</sup>;Parp1<sup>-/-</sup></i> mESC | This paper                 | N/A            |
| SUM149PT                                                                                          | ATCC                       | RRID:CVCL_3422 |
| HEK293FT                                                                                          | ATCC                       | RRID:CVCL_6911 |
| U2OS                                                                                              | ATCC                       | RRID:CVCL_0042 |
| RPE1-hTERT <i>TP53<sup>-/-</sup></i> (SKO)                                                        | (Noordermeer et al., 2018) | N/A            |
| RPE1-hTERT <i>TP53<sup>-/-</sup>;BRCA1<sup>-/-</sup></i> (DKO)                                    | (Noordermeer et al., 2018) | N/A            |
| RPE1-hTERT <i>TP53<sup>-/-</sup>;BRCA1<sup>-/-</sup>;TP53BP1<sup>-/-</sup></i> (TKO)              | (Noordermeer et al., 2018) | N/A            |
| <b>Experimental Models: Organisms/Strains</b>                                                     |                            |                |
| Mouse: FVB/NRj                                                                                    | Janvier Labs               | N/A            |
| <b>Oligonucleotides</b>                                                                           |                            |                |
| see table S2 for sgRNA and primer sequences                                                       | This paper                 | N/A            |
| siCtrl (non-targeting siRNA)                                                                      | Ambion                     | Cat#4390843    |
| mouse siLIG3                                                                                      | Ambion                     | Cat#s69230     |
| human siLIG3 #1                                                                                   | Ambion                     | Cat# s8177     |
| human siLIG3 #2                                                                                   | Ambion                     | Cat# s8178     |
| <b>Recombinant DNA</b>                                                                            |                            |                |

|                                                                |                                         |                             |
|----------------------------------------------------------------|-----------------------------------------|-----------------------------|
| shRNA DDR-targeting library (TRCMm1.0, lentiviral)             | (Xu et al., 2015)                       | N/A                         |
| Plasmid: pLKO.1-scrambled shRNA (lentiviral)                   | (Xu et al., 2015)                       | N/A                         |
| Plasmid: pLKO.1- <i>Lig3</i> shRNA #1 (mouse, lentiviral)      | Sigma Mission Library, TRCMm1.0         | TRCN0000070978              |
| Plasmid: pLKO.1- <i>Lig3</i> shRNA #2 (mouse, lentiviral)      | Sigma Mission Library, TRCMm1.0         | TRCN0000070982              |
| Plasmid: pLKO.1- <i>Rev7</i> shRNA (mouse, lentiviral)         | Sigma Mission Library, TRCMm1.0         | TRCN0000006570              |
| Plasmid: pLKO.1- <i>LIG3</i> shRNA #1 (human, lentiviral)      | Sigma Mission Library, TRC_2 (human)    | TRCN0000048498              |
| Plasmid: pLKO.1- <i>LIG3</i> shRNA #2 (human, lentiviral)      | Sigma Mission Library, TRC v2.0 (human) | TRCN0000300259              |
| Plasmid: pX330-U6-Chimeric_BB-CBh-hSpCas9                      | (Cong et al., 2013)                     | Addgene #42230              |
| Plasmid: pX330-U6-Chimeric_BB-CBh-hSpCas9 <i>Trp53</i> sgRNA   | This paper                              | N/A                         |
| Plasmid: lentiGuide-Puro (lentiviral)                          | (Sanjana et al., 2014)                  | Addgene #52963              |
| Plasmid: lentiGuide-Puro (non-targeting) NT sgRNA (lentiviral) | This paper                              | N/A                         |
| Plasmid: lentiGuide-Puro <i>Trp53bp1</i> sgRNA (lentiviral)    | This paper                              | N/A                         |
| Plasmid: lentiGuide-Puro <i>Parp1</i> sgRNA#1 (lentiviral)     | This paper                              | N/A                         |
| Plasmid: lentiGuide-Puro <i>Parp1</i> sgRNA#4 (lentiviral)     | This paper                              | N/A                         |
| Plasmid: pEGFP-c3-PARP1                                        | (Mortusewicz et al., 2007)              | gift from Valerie Schreiber |
| <b>Software and Algorithms</b>                                 |                                         |                             |
| MAGeCK                                                         | (Li et al., 2014)                       | N/A                         |
| DESeq2                                                         | (Love et al., 2014)                     | N/A                         |

|                                                                    |                                                                          |     |
|--------------------------------------------------------------------|--------------------------------------------------------------------------|-----|
| ImageJ software64                                                  | (Rueden et al., 2017)                                                    | N/A |
| Cell Profiler software version 3.1.5                               | (McQuin et al., 2018)                                                    | N/A |
| TIDE (Tracking of Indels by Decomposition)                         | (Brinkman et al., 2014)                                                  | N/A |
| TIDER (Tracking of Insertions, DEletions and Recombination events) | (Brinkman et al., 2018)                                                  | N/A |
| Benchling [Biology Software]. (2019).                              | Retrieved from <a href="https://benchling.com">https://benchling.com</a> | N/A |
| ScanR Analysis Software                                            | Olympus                                                                  | N/A |
| Tibco spotfire software                                            | (TIBCO Spotfire ®)                                                       | N/A |
| ImageJ macro for the analysis of DNA-damage induced foci           | (Xu et al., 2015)                                                        | N/A |
| SynergyFinder                                                      | (Ianevski et al., 2020)                                                  | N/A |

## 698 **EXPERIMENTAL MODEL AND SUBJECT DETAILS**

### 699 **Cell Lines**

700 KP3.33 (Evers et al., 2008), KB1P-G3, KB1P-177a5 (Jaspers et al., 2013) and KB1P-G3B1 (Barazas et  
701 al., 2019) have been previously described. LIG3 nuclear mutants, KB1P-177a5-B1, KB1P-177a5-A3 and  
702 KB1P-177a5-F5, have been generated in this study. All these cell lines were cultured in in  
703 DMEM/F12+GlutaMAX (Gibco) containing 5µg/ml Insulin (Sigma, #I0516), 5 ng/ml cholera toxin (Sigma,  
704 #C8052), 5 ng/ml murine epidermal growth-factor (EGF, Sigma, #E4127), 10% FBS and 50 units/ml  
705 penicillin-streptomycin (Gibco) and were cultured under low oxygen conditions (3% O<sub>2</sub>, 5% CO<sub>2</sub> at 37°C).  
706 Mouse ES cells with a selectable conditional *Brca1* deletion (*R26Cre<sup>ERT2/wt</sup>;Brca1<sup>SCo/-</sup>*) have been  
707 previously described (Bouwman et al. 2010). Additional knockout of *Trp53*, *Trp53bp1* and *Parp1* has  
708 been generated in this study. These cells were cultured on gelatin-coated plates in 60% buffalo red liver  
709 (BRL) cell conditioned medium, 0.1 mM β-mercaptoethanol (Merck) and 10<sup>3</sup> U/ml ESGRO LIF (Millipore)  
710 and 50 units/ml penicillin-streptomycin (Gibco) under normal oxygen conditions (21% O<sub>2</sub>, 5% CO<sub>2</sub>, 37°C).  
711 SUM149PT (RRID:CVCL\_3422) cells were grown in RPMI1640 (Gibco) medium supplied with 10% fetal  
712 calf serum and 50 units/ml penicillin-streptomycin (Gibco). RPE1-hTERT and U2OS (RRID:CVCL\_0042)

713 cell lines were grown in DMEM+GlutaMAX (Gibco) supplemented with 10% FBS and 50 units/ml  
714 penicillin-streptomycin (Gibco). *hTERT;Cas9;TP53<sup>-/-</sup>*, *hTERT;Cas9;TP53<sup>-/-</sup>;BRCA1<sup>-/-</sup>* and  
715 *hTERT;Cas9;TP53<sup>-/-</sup>;BRCA1<sup>-/-</sup>;TP53BP1<sup>-/-</sup>* RPE1 cells were generated by Noordermeer et al. 2018.  
716 HEK293FT (RRID:CVCL\_6911) cells were cultured in IMDM+GlutaMAX-I (Gibco) supplemented with  
717 10% FBS and 50 units/ml penicillin-streptomycin (Gibco). SUM149PT and U2OS cell lines were cultured  
718 under normal oxygen conditions (21% O<sub>2</sub>, 5% CO<sub>2</sub>, 37°C). RPE1 cell lines were cultured under low  
719 oxygen conditions (3% O<sub>2</sub>, 5% CO<sub>2</sub> at 37°C).

## 720 **Tumor-Derived Organoids**

721 All lines have been described before (Duarte et al., 2018). ORG-KB1P4N.1 and ORG-KB1P4R.1 tumor  
722 organoids were derived from a PARPi-naïve and PARPi-resistant *K14cre;Brca1<sup>F/F</sup>;Trp53<sup>F/F</sup>* (KB1P)  
723 mouse mammary tumor, respectively. The ORG-KPM.1 tumor organoid line was derived from a  
724 *K14cre;Trp53<sup>F/F</sup>;Abcb1a<sup>-/-</sup>;Abcb1b<sup>-/-</sup>* (KPM) mouse mammary tumor. Cultures were embedded in  
725 Cultrex Reduced Growth Factor Basement Membrane Extract Type 2 (BME, Trevigen; 40 ml  
726 BME:growth media 1:1 drop in a single well of 24-well plate) and grown in Advanced DMEM/F12 (Gibco)  
727 supplemented with 1M HEPES (Gibco), GlutaMAX (Gibco), 50 units/ml penicillin-streptomycin (Gibco),  
728 B27 (Gibco), 125 mM N-acetyl-L-cysteine (Sigma) and 50 ng/ml murine epidermal growth factor (Sigma).  
729 Organoids were cultured under standard conditions (37°C, 5% CO<sub>2</sub>) and regularly tested for mycoplasma  
730 contamination.

## 731 **Mice**

732 All animal experiments were approved by the Animal Ethics Committee of The Netherlands Cancer  
733 Institute (Amsterdam, the Netherlands) and performed in accordance with the Dutch Act on Animal  
734 Experimentation (November 2014). Organoid transplantation experiments were performed in syngeneic,  
735 wild-type F1 FVB (FVB/NRj) females, at the age of 6 weeks. Parental FVB animals were purchased from  
736 Janvier Labs. Animals were assigned randomly to the treatment groups and the treatments were  
737 supported by animal technicians who were blinded regarding the hypothesis of the treatment outcome.

## 738 **Human Samples of Serous Ovarian Cancer**

739 Paraffin-embedded material from the cohort of ovarian tumors was collected at the Department of  
740 Pathology, University Hospital, Las Palmas, Gran Canaria, Spain, from surgical operations performed in  
741 the period 1995-2005. For the purpose of the present study, only samples from serous ovarian carcinoma  
742 (the type approved for treatment by PARP inhibitors) were used from a larger cohort that was reported  
743 previously (Moudry et al., 2016), and included also other histological types of ovarian tumors. The use of  
744 long-term stored tissue samples in this study was in accordance with the Spanish codes of conduct (Ley  
745 de Investigación Biomédica) and was approved by the review board of the participating institution.  
746 Patients were informed that samples may be used for research purposes under the premise of anonymity.

## 747 **METHOD DETAILS**

### 748 **Functional Genetic Screens**

749 The DDR shRNA library was stably introduced into *Brca1<sup>-/-</sup>;Trp53<sup>-/-</sup>;Trp53bp1<sup>-/-</sup>* mESCs and in  
750 KB1P4.R1 by lentiviral transduction using a multiplicity of transduction (MOI) of 1, in order to ensure that  
751 each cell only gets incorporated with one only sgRNA. mES cells and organoids were selected with  
752 puromycin, 3 µg/ml, for 3 days and then seeded in the presence of PARPi (IC50<30, mES cells, 25nM  
753 olaparib; organoids, 50nM), left untreated or pelleted for the genomic DNA isolation (T0). The total  
754 number of cells used in a single screen was calculated as following: library complexity x coverage (5000x  
755 in mESc, 1000x in organoids). Cells were kept in culture for 3 weeks and passaged every 5 days (and  
756 seeded in single cells) while keeping the coverage at every passage. mES cells were seeded at a density  
757 of 2,500 cells per 15 cm dish and organoids at a density of 50,000 cells/well, 24-well format. Screens  
758 were done in triplicate for each condition. In the end of the screen, cells were pooled and genomic DNA  
759 was extracted (QIAmp DNA Mini Kit, Qiagen). shRNA sequences were retrieved by a two-step PCR  
760 amplification, as described before (Xu et al., 2015). To maintain screening coverage, the amount of  
761 genomic DNA used as an input for the first PCR reaction was taken into account (6 µg of genomic DNA  
762 per 10<sup>6</sup> genomes, 1 µg/PCR reaction). Resulting PCR products were purified using MiniElute PCR  
763 Purification Kit (Qiagen) and submitted for Illumina sequencing. Sequence alignment and dropout  
764 analysis was carried out using the algorithms MaGECK (Li et al., 2014) (FDR <= 0.1) and DESeq2 (Love  
765 et al., 2014) (FDR <= 0.05, log<sub>2</sub>Fc <=-2, baseMean >= 100, at least 3 hit shRNA in the depletion direction  
766 and none in the opposite direction). In order to reduce the noise level, we filtered out sgRNAs with low  
767 counts in the T0 sample: mESc, sum of the three T0 samples >= 10, organoids, mean over the three T0  
768 samples >= 50. Gene ranking is generated automatically with MaGECK algorithm. To generate gene



769 ranking based on DESeq2 algorithm, we calculated per gene the number of hit shRNAs and the mean of  
770 the log2FoldChange over those shRNAs. We then ranked the genes based on these two metrics.

## 771 **Constructs**

772 A collection of 1,976 lentiviral hairpins targeting 391 DDR-related mouse genes (pLKO.1; DDR library)  
773 was derived from the Sigma Mission library (TRCMm1.0) as described before (Xu et al., 2015). Individual  
774 hairpin constructs used in the validation studies were selected from the TRC library: mouse LIG3 shRNA  
775 #1: TRCN0000070978, mouse LIG3 shRNA #2: TRCN0000070982, mouse REV7 shRNA:  
776 TRCN0000006570, human LIG3 shRNA #1: TRCN0000048498, human LIG3 shRNA #2:  
777 TRCN0000300259. For CRISPR/Cas9-mediated genome editing of *Parp1*, two individual sgRNAs were  
778 cloned into plentiGuide-Puro (lentiviral) as described previously (Sanjana et al., 2014). For laser micro-  
779 irradiation experiments we used pEGFP-c3-PARP1 (gift from Valerie Schreiber). All constructs were  
780 verified by Sanger sequencing.

## 781 **Lentiviral Transductions**

782 Lentiviral stocks, pseudotyped with the VSV-G envelope, were generated by transient transfection of  
783 HEK293FT cells, as described before (Follenzi et al., 2000). Production of integration-deficient lentivirus  
784 (IDLV) stocks was carried out in a similar fashion, with the exception that the packaging plasmid contains  
785 a point mutation in the integrase gene (psPAX2, gift from Bastian Evers). Lentiviral titers were determined  
786 using the qPCR Lentivirus Titration Kit (Applied Biological Materials), following the manufacturer's  
787 instructions. For all experiments the amount of lentiviral supernatant used was calculated to achieve an  
788 MOI of 50, except for the transduction of the lentiviral library for which a MOI of 1 was used, as described  
789 above. 2D cells were incubated with lentiviral supernatants overnight in the presence of polybrene (8  
790 µg/ml). 3D Tumor-derived organoids were transduced according to a previously established protocol  
791 (Duarte et al., 2018). Antibiotic selection was initiated right after transduction for 2D cells, 24h after  
792 transduction in organoids, and was carried out for 3 consecutive days.

## 793 **Genome Editing**

794 For CRISPR/Cas9-mediated genome editing of *Trp53* in mESCs, *R26Cre<sup>ERT2/wt</sup>;Brca1<sup>SCo/-</sup>* cells  
795 (Bouwman et al., 2010) were transiently transfected with a modified a pX330-U6-Chimeric-BB-CBh-

796 hSpCas9 plasmid containing a puromycin resistance marker (Cong et al., 2013; Drost et al., 2016) in  
797 which a sgRNA targeting *Trp53* was cloned. Knockout clones were selected under puromycin for 3 days  
798 and tested by TIDE and western blot.

799 For CRISPR/Cas9-mediated genome editing of *Trp53bp1* in mESCs, Cas9-expressing  
800 *R26Cre<sup>ERT2/Cas9</sup>;Brca1<sup>SCo/-</sup>;Trp53<sup>-/-</sup>* cells (Barazas et al., 2018) were incubated with lentiviral supernatants  
801 of pLentiGuide-Puro cloned with a sgRNA targeting *Trp53bp1*. After selection with puromycin for 3 days,  
802 surviving cells were subcloned and tested by TIDE and western blot.

803 For CRISPR/Cas9-mediated genome editing of *Parp1*, the Cas9-expressing *R26Cre<sup>ERT2/Cas9</sup>;*  
804 *Brca1<sup>-/-</sup>;Trp53<sup>-/-</sup>;Trp53bp1<sup>-/-</sup>* mESCs were incubated with lentiviral supernatants of pLentiGuide-Puro  
805 cloned with two different sgRNAs targeting *Parp1* (sgRNA1, sgRNA 4). After selection with puromycin for  
806 3 days, surviving cells were subcloned and tested by TIDE and western blot.

807 For the disruption of the starting codon encoding for nuclear LIG3, the desired mutation  
808 (ATG>CTC) was introduced in KB1P-177a5 mouse tumor cells according to the Alt-R CRISPR-Cas9  
809 System of IDT (Yoshimi et al., 2016). Briefly, the crRNA targeting sequence and the homology template,  
810 a 120bp ssODN, were designed using CRISPR design tools of Benchling. While the sgRNA was designed  
811 to target the nuclear ATG, the homology template contains an ATG>CTC mutation, encoding a leucine  
812 instead of the original methionine. 10 µl tracrRNA (100 µM) and 10 µl crRNA (100 µM) were annealed in  
813 80 µl nuclease free duplex buffer (IDT#11-05-01-03) to form a 10µM gRNA solution. The ssODN template  
814 was also annealed to form a 10µM solution. 6 µl of 10 µM sgRNA, 6 µl of 10 µM Cas9 protein, and 6 µl  
815 of 10 µM ssODN (Ultramer IDT) were mixed in optiMEM (Gibco), to final volume of 125 µl and incubated  
816 for 5 min at RT (Mix 1). Then, 3µl of Lipofectamine RNAiMAX (Invitrogen) were mixed with 122 µl with  
817 optiMEM (Mix 2). Mix 1 and mix 2 were mixed together and incubated at RT for 20 min. During these 20  
818 min, 150.000 cells were trypsinized and collected in 750 µl of medium. The 250 µl Mix was then added  
819 to the cells in a 12-well for reverse transfection. Next day cells were expanded and 3 days after  
820 transfection the cells were harvested for analysis of the genomic DNA.

821 To assess modification rate, genomic DNA was extracted (Puregene Core Kit A, Qiagen) and 100  
822 ng was used as an input for the PCR amplification of the targeted sequence. PCR reaction was performed  
823 with Thermo Scientific Phusion High-Fidelity PCR Master Mix (Thermo Scientific), according to  
824 manufacturer's instructions (3-step protocol: annealing - 60C for 5 s, extension time 30 s) and using  
825 primers listed in Table S2. Resulting PCR products served as a template for the BigDye Terminator v3.1  
826 reaction (Thermo Fisher). BigDye PCR reactions were performed with the same forward primers as in  
827 the preceding PCR reactions (no reverse primer used) and according to the BigDye manufacturer's

828 protocol. For knockout, allele composition was determined with the TIDE analysis (Brinkman et al., 2014)  
829 by comparing sequences from modified and parental (transduced with non-targeting sgRNAs) cells. For  
830 knock-in, allele composition was determined with the TIDER analysis (Brinkman et al., 2018) by  
831 comparing sequences from modified and parental cells (transduced with non-targeting sgRNAs), and  
832 reference template. The later was generated with a simple two-step PCR protocol, with two  
833 complementary primers designed to carry the designed mutations as present in the donor template  
834 (Brinkman et al. 2018).

### 835 **siRNA and Transfections**

836 Non-targeting siRNA and siRNA against mouse and human LIG3 were transfected into the cells using  
837 Lipofectamine RNAiMAX (Invitrogen) according to the manufacturer's instructions. All experiments were  
838 carried out between 48 and 72hr post-transfection.

### 839 **Long-Term Clonogenic Assays**

840 Long-term clonogenic assays were always performed in 6-well plates, with exception of organoids which  
841 were cultured in 24-well plated as described before. Cells were seeded at low density to avoid contact  
842 inhibition between the clones (KB1P1-G3: 5,000 cells/well; KB1P-177a5: 2,500 cells/well; ORG-  
843 KB1P4.S1 and ORG-KB1P4.R1: 50.000 cells/well; *Brca1<sup>-/-</sup>;Trp53<sup>-/-</sup>;Trp53bp1<sup>-/-</sup>* mESCs: 3,000  
844 cells/well; *Brca1<sup>-/-</sup>;Trp53<sup>-/-</sup>* mESCs: 5,000 cells/well; SUM149PT: 5,000 cells/well; RPE1-SKO: 3,000  
845 cells/well, RPE1-DKO and RPE1-TKO: 5,000 cells/well) and cultured for 10-15 days. Media was  
846 refreshed once a week. For the quantification, cells were incubated with Cell-Titer Blue (Promega)  
847 reagent and later fixed with 4% formaldehyde and stained with 0.1% crystal violet. Drug treatments: cells  
848 were grown in the continuous presence of PARPi (olaparib, talazoparib or veliparib) at the indicated  
849 concentrations. mESCs with a selectable conditional *Brca1* deletion were treated with 0.5μM 4OHT for 3  
850 days right before the start of the clonogenic assay, when indicated. PARPi were reconstituted in DMSO  
851 (10 mM) and 4OHT in EtOH (2.5 mM).

### 852 **RT-qPCR**

853 In order to determine gene expression levels, RNA was extracted from cultured cells using ISOLATE II  
854 RNA Mini Kit (Bioline) and used as a template to generate cDNA with Tetro cDNA Synthesis Kit (Bioline).  
855 Quantitative RT-PCR was performed using SensiMix SYBR Low-ROX Kit (Bioline; annealing temperature  
856 – 60°C) in a Lightcycler 480 384-well plate (Roche), and analyzed using Lightcycler 480 Software v1.5  
857 (Roche). Mouse *Rps20* and human *HPRT* were used as house-keeping genes. The primer sequences  
858 used in this study are listed in Table S2.

## 859 **Western Blot**

860 Cells were trypsinized and then lysed in lysis buffer (20 mM Tris pH 8.0, 300 mM NaCl, 2% NP40, 20%  
861 glycerol, 10 mM EDTA, protease inhibitors (cOmplete Mini EDTA-free, Roche, 100x stock)), for 20 min.  
862 For PAR detection in PARP1 knockout mES cells, 10 $\mu$ M PARGi was added to the lysis buffer, when  
863 indicated. For P53 detection, cells were irradiated at 15 x 100  $\mu$ J/cm<sup>2</sup>. The protein concentration was  
864 determined using Pierce BCA Protein Assay Kit (Thermo Scientific). SDS-Page was carried out with the  
865 Invitrogen NuPAGE SDS-PAGE Gel System (Thermo Fisher; for LIG3: 2-8% Tris-acetate gels were used,  
866 buffer Tris-Acetate; for all other proteins: 4–12% Bis-Tris gels were used, buffer: MOPS; input: 40 $\mu$ g  
867 protein), according to the manufacturer's protocol. Next, proteins were electrophoretically transferred to  
868 a nitrocellulose membrane (Biorad). Before blocking, membranes were stained with Ponceau S, followed  
869 by blocking in 5% (w/v) milk in TBS-T for 1hr at RT. Membranes were incubated with primary antibody  
870 4hrs at RT in 1% (w/v) milk in TBS-T (rabbit anti-PARP1, 1:1000; rabbit anti-H3, 1:5000; mouse anti-lig3,  
871 1:500; rabbit anti-tubulin, 1:1000; anti-PAR, 1:1000; anti-PARP2, 1:2000; mouse anti-P53, 1:1000).  
872 Horseradish peroxidase (HRP)-con-jugated secondary antibody incubation was performed for 1 hr at RT  
873 (anti-mouse or anti-rabbit HRP 1:2000) in 1% (w/v) milk in TBS-T. Signals were visualized by ECL (Pierce  
874 ECL Western Blotting Substrate, Thermo Scientific).

## 875 **Viability Assay in PARP1 Knockout Cells**

876 *Brca1<sup>-/-</sup>;Trp53<sup>-/-</sup>;Trp53bp1<sup>-/-</sup>;Parp1<sup>-/-</sup>* mESCs cells were treated with 0.5 $\mu$ M 4OHT for 3 days right before  
877 the start of the assay or left untreated. Cells were then seeded in 12-well plates (150.000 cell/well) and,  
878 24 hr after seeding, transfected with non-targeting siRNA or siRNA against mouse LIG3 as described  
879 above. Medium was refreshed 24 hr after transfections and assay was stopped after 4 days.  
880 Transfections were carried out in duplicate; one well was stained and quantified and another well was

881 collected and expanded for western blot analysis. Quantification was carried out by determining the  
882 absorbance of crystal violet at 590 nm after extraction with 10% acetic acid.

### 883 **PARP1 Trapping Assay**

884 PARP1 trapping assay was adapted from previously described protocols (Gogola et al., 2018; Murai et  
885 al., 2012). 24 hr prior to the experiment, transfected cells were seeded in 10cm dishes at 70-90%  
886 confluency. The day of the experiment, cells were pre-incubated with 0.5 $\mu$ M olaparib for 1 hr; and then  
887 exposed to the same treatments but in a presence of 0.01% MMS for 30 min; following incubation with  
888 MMS cells were further incubated with olaparib for 2hr. Following the indicated treatments, cells were  
889 collected and subsequently lysed to isolate chromatin-bound fractions. Fractionation was performed with  
890 Subcellular Protein Fractionation Kit from Thermo Scientific (#78840, Rockford, IL, USA), following the  
891 manufacturer's instructions. Immunoblotting was carried out as described in previous section (Western  
892 Blot). Quantification of signal was performed by Fusion FX by Vilber and normalized to loading control.

### 893 **Laser Micro-Irradiation Assays**

894 U2OS cells were transiently transfected (using Lipofectamine 2000, Invitrogen; according to the  
895 manufacturer's protocol) with EGFP-c3-PARP1 (kind gift from Valerie Schreiber) vector. Cells were  
896 seeded on Lab-Tek chambered coverglasses (catalog no: 155380) and pre-sensitized with 10 $\mu$ M BrdU,  
897 24 hr before micro-irradiation. After the indicated treatments, cellular nuclei were irradiated with 355nm  
898 UV ablation laser at 0.15 power setting, repetition rate 200Hz, pulse energy >60 $\mu$ J, pulse length < 4ns  
899 (Rapp OptoElectronic). Live cell imaging was performed in 37°C and 5% CO<sub>2</sub> chamber, on average 6  
900 cells were imaged per condition, per replicate. During live cell imaging, cells were incubated in anti-  
901 bleaching live cell visualization medium DMEMgfp-2. Cellular response to DSB formation was monitored  
902 with x63 objective using Nikon confocal microscope equipped with a Perkin Elmer spinning disk. Images  
903 were acquired every minute for a period of 30 minutes. Volocity software was used to control the  
904 hardware and recruitment kinetics of GFP-PARP1 were analyzed by Image J software.

### 905 **Proximity ligation-based assay (PLA)**

906 Protocol was carried out as mentioned previously (Mukherjee et al., 2019). On coverslips, cells were  
907 grown to a confluence of 60-70%. On the day of the experiment, cells were incubated with PARGi (10 $\mu$ M)

908 for a total of 30 minutes or 0.5 $\mu$ M olaparib for 2hr and the final 10 minutes cells were incubated with EdU  
909 (20 $\mu$ M) during PARGi incubation to visualize S-phase cells. After EdU labeling cells were gently washed  
910 two times with PBS and fixed with 4% paraformaldehyde for 15 min at RT. PFA was discarded after  
911 fixation and slides were washed with cold PBS for 8 minutes each three times. Cells were next  
912 permeabilized by incubating the coverslips in PBS containing 0.5% Triton-X for 15 min at RT and  
913 subsequently washed in PBS twice for 5 min each. Freshly prepared click reaction mix (2mM of copper  
914 sulfate, 10  $\mu$ M of biotin-azide and 100 mM of sodium ascorbate were added to PBS in that order and  
915 mixed well) was applied to the slides (30  $\mu$ l/slide) in a humid chamber and incubated for 1 hr at RT. Slides  
916 were washed with PBS for 5 min after the click reaction and placed back in the humid chamber and  
917 blocked at room temperature for 1 hr with a blocking buffer (10% goat serum and 0.1%Triton X-100 in  
918 PBS). In combination with anti-biotin (1:1000), rabbit anti-LIG3 (1:150, Sigma-Aldrich, #HPA006723)  
919 primary antibody was diluted in a blocking solution, dispensed to slides (30  $\mu$ l/slide) and incubated in a  
920 humid chamber at 4°C overnight. Slides were washed with wash buffer A (0.01 M Tris-HCl, 0.15 M NaCl,  
921 and 0.05 % Tween-20, pH 7.4) for 5 min each after overnight incubation. Duolink In Situ PLA probes, the  
922 anti-mouse plus and anti-rabbit minus were diluted 1:5 in the blocking solution (10% goat serum and  
923 0.1% Triton X-100 in PBS), dispensed to slides (30  $\mu$ l/well) and incubated at 37°C for 1 hr. Slides were  
924 washed three times with buffer-A, 5 min each. The ligation mix was prepared by diluting Duolink ligation  
925 stock (1:5) and ligase (1:40) in high purity water and was applied to slides (30  $\mu$ l/well) and incubated at  
926 37°C for 30 min. Slides were washed with buffer-A twice for 2 min each. Amplification mix was prepared  
927 by diluting Duolink amplification stock (1:5) and rolling circle polymerase (1:80) in high-purity water and  
928 applied to slides (30 $\mu$ l /well) and incubated for 100 min at 37°C in a humid chamber. Slides were washed  
929 with wash buffer-B solution (0.2 M Tris and 0.1 M NaCl) three times for 10 min each and one time in  
930 0.01X diluted wash buffer-B solution for 1 min. Coverslips were incubated with DAPI for 5 min and  
931 mounted with ProLong Gold antifade reagent (Invitrogen) and imaged using confocal and analyzed using  
932 ImageJ software 64.

## 933 **Immunofluorescence**

### 934 *RAD51 IRIF*

935 Cells were seeded on Millicell EZ slides (#PEZGS0816, Millipore) 24 hr prior the assay to achieve ~90%  
936 confluency. Cells were then irradiated using the Gammacell 40 Extractor (Best Theratronics Ltd.) at the  
937 dose of 10 Gy and allowed to recover for 3 hr. Cells washed with PBS++ (PBS solution containing 1 mM  
938 CaCl<sub>2</sub> and 0.5 mM MgCl<sub>2</sub>) and pre-extracted with 0.5% (v/v) Triton X-100 in PBS++ for 5 min. Next, cells

939 were washed with PBS++ and fixed with 2% (v/v) paraformaldehyde solution in PBS for 20 min. Next,  
940 cells were permeabilized with ice-cold methanol/acetone solution (1:1) for 15 min. To minimize the  
941 background, cells were further incubated for 20 min in staining buffer (1% (w/v) BSA, 1% (v/v) FBS,  
942 0.15% (w/v) glycine and 0.1% (v/v) Triton X-100 in PBS). Staining buffer was also used as a solvent for  
943 antibodies – primary antibody anti-RAD51, 1:1500, #ab133534, abcam; secondary antibody Alexa Fluor®  
944 658-conjugated, 1:1000, A11011, Invitrogen. Incubation with primary and secondary antibodies was done  
945 for 2 hr and 1 hr, respectively. All incubations were performed at room temperature. Samples were  
946 mounted with VECTASHIELD Hard Set Mounting Media with DAPI (#H-1500; Vector Laboratories).  
947 Images were captured with Leica SP5 (Leica Microsystems) confocal system and analyzed using an in-  
948 house developed macro to automatically and objectively evaluate the DNA damage-induced foci (Xu et  
949 al., 2015). As a positive and negative control for RAD51 staining, BRCA-proficient KP-3.33 and BRCA1-  
950 deficient KB1P-G3 cells were used.

#### 951 *LIG3-EdU co-localization assay*

952 Cells were incubated with 20  $\mu$ M EdU for 1hr to visualize cells in S-phase. In the last 20 min, 10 $\mu$ M PARGi  
953 was added to the medium. Cells washed with PBS and pre-extracted with CSK50 buffer for 7 min (10 $\mu$ M  
954 PARGi was added to pre-extraction buffer). Cells were washed with PBS and fixed with 4% formaldehyde,  
955 followed by three washes with PBS and permeabilization with ice-cold methanol/acetone solution (1:1).  
956 EdUClick-iT reaction mix was added to each well and incubated at RT for 30 min. Fixed cells were  
957 washed three times with staining buffer (5% (v/v) FBS, 5% (w/v) BSA, and 0.05% (v/v) Tween-20 in PBS)  
958 and incubated with primary antibody anti-LIG3 (1:150, Sigma-Aldrich, #HPA006723) in staining buffer for  
959 2hr at RT. After three washes in staining buffer, cells were incubated with secondary antibody anti-rabbit  
960 Alexa Fluor 488 (1:500, A27034, Invitrogen) in staining buffer, followed by three last washes in staining  
961 buffer and one wash in PBS. Samples were mounted with VECTASHIELD Hard Set Mounting Media with  
962 DAPI (#H-1500; Vector Laboratories). Images were captured with Leica SP5 (Leica Microsystems)  
963 confocal system and analyzed with ImageJ software.

#### 964 **DNA Fiber assay in tumor cells**

965 DNA fiber analysis was conducted in accordance with the previously described protocol (Ray Chaudhuri  
966 et al., 2012). Briefly, cells were transfected for 48 hours followed by treatment with olaparib (0.5 $\mu$ M), or  
967 left untreated, for the final two hours. Cells were sequentially pulse-labelled with nucleotide analogues,  
968 30 $\mu$ M CldU (c6891, Sigma-Aldrich) and 250 $\mu$ M IdU (I0050000, European Pharmacopoeia) for 20 min

969 during the incubation of olaparib. After double labelling, cells were washed with PBS, harvested and  
970 resuspended in ice cold PBS to the final concentration  $2.5 \times 10^5$  cells per ml. Labelled cells were mixed  
971 with unlabeled cells at 1:1 (v/v), and 2.5  $\mu$ l of cell suspension was spotted at the end of the microscope  
972 slide. 8  $\mu$ l of lysis buffer (200mM Tris-HCl, pH 7.5, 50mM EDTA, and 0.5% (w/v) SDS) was applied on  
973 the top of the cell suspension, then mixed by gently stirring with the pipette tip and incubated for 8 min.  
974 Following cell lysis, slides were tilted to 15–45° to allow the DNA fibers spreading along the slide, air  
975 dried, fixed in 3:1 methanol/acetic acid overnight at 4 °C. Subsequently, fibers were denatured with 2.5  
976 M HCl for 1 hr. After denaturation, slides were washed with PBS and blocked in blocking solution (0.2%  
977 Tween 20 in 1% BSA/PBS) for 40 min. After blocking, primary antibody solutions are applied, anti-BrdU  
978 antibody recognizing CldU (1:500, ab6326; Abcam) and IdU (1:100, B44, 347580; BD) for 2 hours in the  
979 dark at RT followed by 1h incubation with secondary antibodies: anti–mouse Alexa Fluor 488 (1:300,  
980 A11001, Invitrogen) and anti–rat Cy3 (1:150, 712-166-153, Jackson Immuno-Research Laboratories,  
981 Inc.). Finally, slides are washed with PBS and subsequently mounting medium is spotted and coverslips  
982 are applied by gently pressing down. Slides were sealed with nail polish and air dried. Fibers were  
983 visualized and imaged by Carl Zeiss Axio Imager D2 microscope using 63X Plan Apo1.4 NA oil immersion  
984 objective. Data analysis was carried out with ImageJ software<sup>64</sup>.

985

#### 986 **DNA fiber assay and S1 nuclease analysis in RPE1-hTERT cells**

987 These assays were performed as previously described (Cong et al., 2019; Peng et al., 2018). Briefly,  
988 cells were treated for 2 hr with 0.5 $\mu$ M olaparib or left untreated. During the last 40 min, cells were labeled  
989 by sequential incorporation of IdU and CldU into nascent DNA strand. Cells were then collected, washed,  
990 spotted, and lysed on positively charged microscope slides by 7.5 mL spreading buffer for 8 min at RT.  
991 For experiments with the ssDNA-specific endonuclease S1, cells were treated with CSK100 buffer for 10  
992 min at RT, after the CldU pulse, and then incubated with S1 nuclease buffer with or without 20 U/mL S1  
993 nuclease for 30 min at 37°C. The cells were then scraped in PBS + 0.1% BSA and centrifuged at 7,000  
994 rpm for 5 min at 4°C. Cell pellets were resuspended at 1,500 cells/mL and lysed on slides as described  
995 above. Individual DNA fibers were released and spread by tilting the slides at 45°C. After air-drying, fibers  
996 were fixed by 3:1 methanol/acetic acid at RT for 3 min. Fibers were then rehydrated in PBS, denatured  
997 with 2.5 M HCl for 30 min, washed with PBS, and blocked with blocking buffer for 1 hr. Next, slides were  
998 incubated for 2.5 hr with primary antibodies diluted in blocking buffer (IdU, B44, 347580; BD; CldU,  
999 ab6326, Abcam), washed several times in PBS, and then incubated with secondary antibodies in blocking  
1000 buffer for 1 hr (IdU, goat anti-mouse, Alexa 488; CldU, goat anti-rat, Alexa Fluor 594). After washing and



1001 air-drying, slides were mounted with Prolong (Invitrogen, P36930). Finally, fibers were visualized and  
1002 imaged with Axioplan 2 imaging, Zeiss.

### 1003 **Immunofluorescence for ssDNA**

1004 Cells were transfected with either siCtrl or siLIG3 using the standard RNAiMAX transfection protocol.  
1005 Post-transfection cells were labeled with 10 $\mu$ M BrdU for 48hr. Upon treatment with the final 2hr PARPi  
1006 inhibitor (0.5 $\mu$ M), the cells were washed with PBS and pre-extracted by CSK-buffer (PIPES 10mM, NaCl  
1007 100mM, Sucrose 300mM, EGTA 250mM, MgCl<sub>2</sub> 1mM, DTT 1mM and protease inhibitors cocktail) on ice  
1008 for 5 minutes. Cells were then fixed using 4% formaldehyde (FA) for 15 min at RT, and then permeabilized  
1009 by 0.5% Triton X-100 in CSK-buffer. Permeabilized cells were then incubated with primary antibody  
1010 against anti-BrdU antibody (Abcam 6326) at 37°C for 1 hr. Cells were washed and incubated with  
1011 secondary antibodies (Alexa Fluor 594) for 1h at room temp. After the wash cells were incubated with  
1012 DAPI (0.1 $\mu$ g/ml) for 5 minutes. Finally, 200  $\mu$ l of PBS was added prior to high content imaging. For high  
1013 content imaging of DAPI and ssDNA signal, Z-stack of 6 stacks (1mm/stack) covering at least 75 fields  
1014 were imaged. Results were analyzed using DAPI channel and filtered with roundness and size of the  
1015 nucleus. The quantification of pixel intensities (mean, median and sum) for each nucleus was calculated  
1016 in the DAPI and 594 nm channels. The quantified values obtained were exported to Tibco spotfire  
1017 software (TIBCO Spotfire ®) for the generation of scatter plots.

### 1018 **Metaphase spreads and telomere FISH**

1019 Metaphase spreads were carried out according to the standard protocol described previously (Mukherjee  
1020 et al., 2019). Briefly, exponentially growing cells (50–80 % confluence) were treated with 0.5 $\mu$ M olaparib  
1021 for 2hr or left untreated, and recovered for 6 hr. Post treatment, drug treated medium was washed out  
1022 and cells were allowed to grow in complete growth medium and exposed with colcemid for 8 h.  
1023 Metaphase spreads were prepared by conventional methods and check under the microscope before  
1024 telomere labelling. Metaphase slides in coplin jar containing 2X SSC buffer (Sigma-S6639) were  
1025 equilibrated at room temperature for 10 minutes. Proteins were digested by incubation of the slides in  
1026 pre-warmed 0.01M HCl containing pepsin for 1.5 min at 37°C. Slides were washed twice with PBS 5 min  
1027 each and then one time with 1 M MgCl<sub>2</sub> in 1X PBS for 5 min. After washing slides were placed in coplin  
1028 jar containing 1% formaldehyde and fixed for 10 mins at RT without shaking. Slides were washed with  
1029 PBS and dehydrated in the ethanol series: 70%, 90% and 100% for 3 minutes each and air dried. Next,

1030 slides were denatured in 70% deionized formamide at 80°C for 1 min 15 sec and immediately placed in  
1031 chilled ethanol series 70%, 90% and 100% for 3 minutes each and allowed slides for air dry. Pre-annealed  
1032 telomere probes were added to the denatured slides and allowed for hybridization at 37°C in hybridization  
1033 chamber for 40 minutes. After hybridization slides were washed sequentially 3 times each with 50%  
1034 formamide in 2X SSC (preheated to 45°C), 0.1X SSC (preheated to 60°C), 4X SSC (0.1% Tween-20),  
1035 and 2X SSC respectively. Slides were allowed to air dry and mounted using DAPI anti-fade. A minimum  
1036 60 metaphase images were captured using Carl Zeiss Axio Imager D2 microscope using 63x Plan Apo  
1037 1.4 NA oil immersion objective and analyzed with ImageJ software<sup>64</sup> for chromosomal aberrations.

### 1038 **Electron microscope analysis**

1039 EM analysis was performed according to the standard protocol (Zellweger et al., 2015). For DNA  
1040 extraction, cells were lysed in lysis buffer and digested at 50 °C in the presence of Proteinase-K for 2hr.  
1041 The DNA was purified using chloroform/isoamyl alcohol and precipitated in isopropanol and given 70%  
1042 ethanol wash and resuspended in elution buffer (TE). Isolated genomic DNA was digested with PvuII HF  
1043 restriction enzyme for 4 to 5 hr. Replication intermediates were enriched by using QIAGEN G-100  
1044 columns (as manufacture's protocol) and concentrated by an Amicon size-exclusion column. The  
1045 benzyldimethylalkylammonium chloride (BAC) method was used to spread the DNA on the water surface  
1046 and then loaded on carbon-coated nickel grids and finally DNA was coated with platinum using high-  
1047 vacuum evaporator MED 010 (Bal Tec). Microscopy was performed with a transmission electron  
1048 microscope FEI Talos, with 4 K by 4 K cmos camera. For each experimental condition, at least 72 RF  
1049 intermediates were analyzed per experiment and ImageJ software<sup>64</sup> was used to process analyze the  
1050 images.

1051

### 1052 **DSB detection by PFGE**

1053 DSB detection by PFGE was done as reported previously (Cornacchia et al., 2012). Cells were casted  
1054 into 0.8% agarose plugs (2.5 x 10<sup>5</sup> cells/plug), digested in lysis buffer (100 mM EDTA, 1% sodium lauryl  
1055 sarcosine, 0.2% sodium deoxycholate, 1 mg/ml proteinase-K) at 37 °C for 36–40 h, and washed in 10 mM  
1056 Tris-HCl (pH 8.0)–100 mM EDTA. Electrophoresis was performed at 14 °C in 0.9% pulse field-certified  
1057 agarose (Bio-Rad) using Tris-borate-EDTA buffer in a Bio-Rad Chef DR III apparatus (9 h, 120°, 5.5 V/cm,

1058 and 30- to 18-s switch time; 6 h, 117°, 4.5 V/cm, and 18- to 9-s switch time; and 6 h, 112°, 4 V/cm, and  
1059 9- to 5-s switch time). The gel was stained with ethidium bromide and imaged on Uvidoc-HD2 Imager.  
1060 Quantification of DSB was carried out using ImageJ software<sup>64</sup>. Relative DSB levels were calculated by  
1061 comparing the results in the treatment conditions to that of the DSB level observed in untreated controls.

## 1062 ***In vivo* studies**

1063 Tumor organoids were collected, incubated with TripLE at 37°C for 10 min, dissociated into single cells,  
1064 resuspended in tumor organoid medium, filtered with 70µm nylon filters (Corning) and mixed in a in  
1065 complete mouse media/BME mixture (1:1). KB1P4.N1 and KB1P4.R1 organoid suspensions contained  
1066 a total of 20.000 and 10.000 cells, respectively, per 40 µl of media/BME mixture, and were injected in the  
1067 fourth right mammary fat pad of wild-type FVB/N mice. Mammary tumor size was determined by caliper  
1068 measurements (length and width in millimeters), and tumor volume (in mm<sup>3</sup>) was calculated by using the  
1069 following formula:  $0.5 \times \text{length} \times \text{width}^2$ . Upon tumor outgrowth to approximately 75 mm<sup>3</sup>, in mice injected  
1070 with N1 organoids, and 40 mm<sup>3</sup>, in mice injected with R1 organoids, mice were treated with vehicle, or  
1071 olaparib (50 mg/kg, mice injected with N1 organoids; 100 mg/kg, mice injected with R1 organoids)  
1072 intraperitoneally for 28 consecutive days. Animals were sacrificed with CO<sub>2</sub> when the tumor volume  
1073 reached 1,500 mm<sup>3</sup>.

## 1074 **Bioinformatic Analysis**

1075 Kaplan–Meier overall survival curves were plotted using Gene Expression Profiling Interactive Analysis  
1076 2.0 (GEPIA2) (GEPIA2; <http://gepia2.cancer-pku.cn/#index>) (Tang et al., 2017). The TCGA breast  
1077 invasive carcinoma, triple-negative breast cancer, luminal breast cancer and ovarian serous  
1078 cystadenocarcinoma cohorts were splitted into two groups: upper 70% and lower 30% quartile expression  
1079 (high vs. low expression).

## 1080 **Immunohistochemistry Analysis**

1081 Five-µm tissue sections were cut from formalin-fixed, paraffin-embedded tissue blocks from a cohort of  
1082 51 human serous ovarian carcinomas (Moudry et al. 2016) and mounted on Super Frost Plus slides  
1083 (Menzel-Glaser, Braunschweig, Germany), baked at 60°C for 60 min, deparaffinized, and rehydrated  
1084 through graded alcohol rinses. Heat induced antigen retrieval was performed by immersing the slides in

1085 citrate pH 6.0 buffer and heating them in a 750 W microwave oven for 15 min. The sections were then  
1086 stained with primary antibody anti-LIG3 (1: 250, Sigma-Aldrich, #HPA006723) overnight in a cold-room,  
1087 followed by subsequent processing by the indirect streptavidin-biotin-peroxidase method using the  
1088 Vectastain Elite kit (Vector Laboratories, Burlingame, CA, USA) and nickel-sulphate-based chromogen  
1089 enhancement detection as previously described (Bartkova et al., 2005), without nuclear counterstaining.  
1090 For negative controls, sections were incubated with non-immune sera. The results were evaluated by  
1091 two experienced researchers, including a senior oncopathologist, and the data expressed as percentage  
1092 of positive tumor cells within each lesion, while recording frequencies of cases with LIG3 overabundant  
1093 (LIG3-high) or lost (LIG3-low) staining in 10-20% and in excess of 20% of the tumor cells (see Figure 6G  
1094 for examples of staining patterns). Cases with over 90% of cancer cells showing a staining intensity  
1095 comparable with surrounding stromal cells on the same section (internal control) were regarded as  
1096 displaying a normal pattern of LIG 3 expression.

## 1097 **QUANTIFICATION AND STATISTICAL ANALYSIS**

1098 Statistical parameters including sample size, precision measures and statistical significance are reported  
1099 in the figures, corresponding figure legends and Method Details sections.

## 1100 **Genetic Screens**

1101 Genetic screens were performed in triplicate and statistical analysis was carried out using the MAGeCK  
1102 and DESeq2 software.

## 1103 **qRT-PCR Analysis**

1104 Gene expression measurements were performed in triplicate, normalized to expression of house-keeping  
1105 genes, and presented as mean  $\pm$  SD of replicates. Statistical significance was estimated with the two-  
1106 tailed unpaired t-test.

## 1107 **Long-Term Clonogenic Assays**

1108 All experiments were repeated three times, unless otherwise stated, and data are presented as mean  $\pm$   
1109 SD of replicates. For statistical analysis the two-tailed unpaired t-test test was used.

### 1110 **Immunoblotting**

1111 Immunoblotting experiments were repeated at least two times. Representative images are shown and  
1112 quantification was carried out when indicated.

### 1113 **Micro-Irradiation Assay**

1114 In each experiment on average 6 cells were micro-irradiated and analyzed per condition, per replicate.  
1115 Experiments were repeated two times and data are presented as mean  $\pm$  SD. Statistical analysis was  
1116 performed using two-tailed unpaired t-test.

### 1117 **DNA Fiber Assays and S1 nuclease**

1118 For DNA fiber assay at least 200 fibers were measured per condition and group comparison was  
1119 performed with Mann–Whitney U test. Experiments were repeated twice.

1120

### 1121 **Immunofluorescence for RAD51 IRIF and ssDNA**

1122 Group comparison was performed with the two-tailed unpaired t-test. Experiments were repeated twice.

1123

### 1124 **Metaphase spreads and telomere FISH**

1125 A minimum 60 metaphase images were captured per replicate. Experiments were repeated at least 3  
1126 times. two-tailed unpaired t-test was used.

### 1127 **Survival Analysis**

1128 Data are presented as Kaplan-Meier curves and the p value between scr sh and shLIG3 in olaparib-  
1129 treated conditions were computed using Log-Rank (Mantel Cox) statistics.

1130 **Survival Analysis**

1131 Data are presented as Kaplan-Meier curves and the p value is computed using Log-Rank (Mantel Cox)  
1132 test.

# FIGURE 1

bioRxiv preprint doi: <https://doi.org/10.1101/2021.03.24.436323>; this version posted March 24, 2021. The copyright holder for this preprint (which was not certified by peer review) is the author/funder. All rights reserved. No reuse allowed without permission.

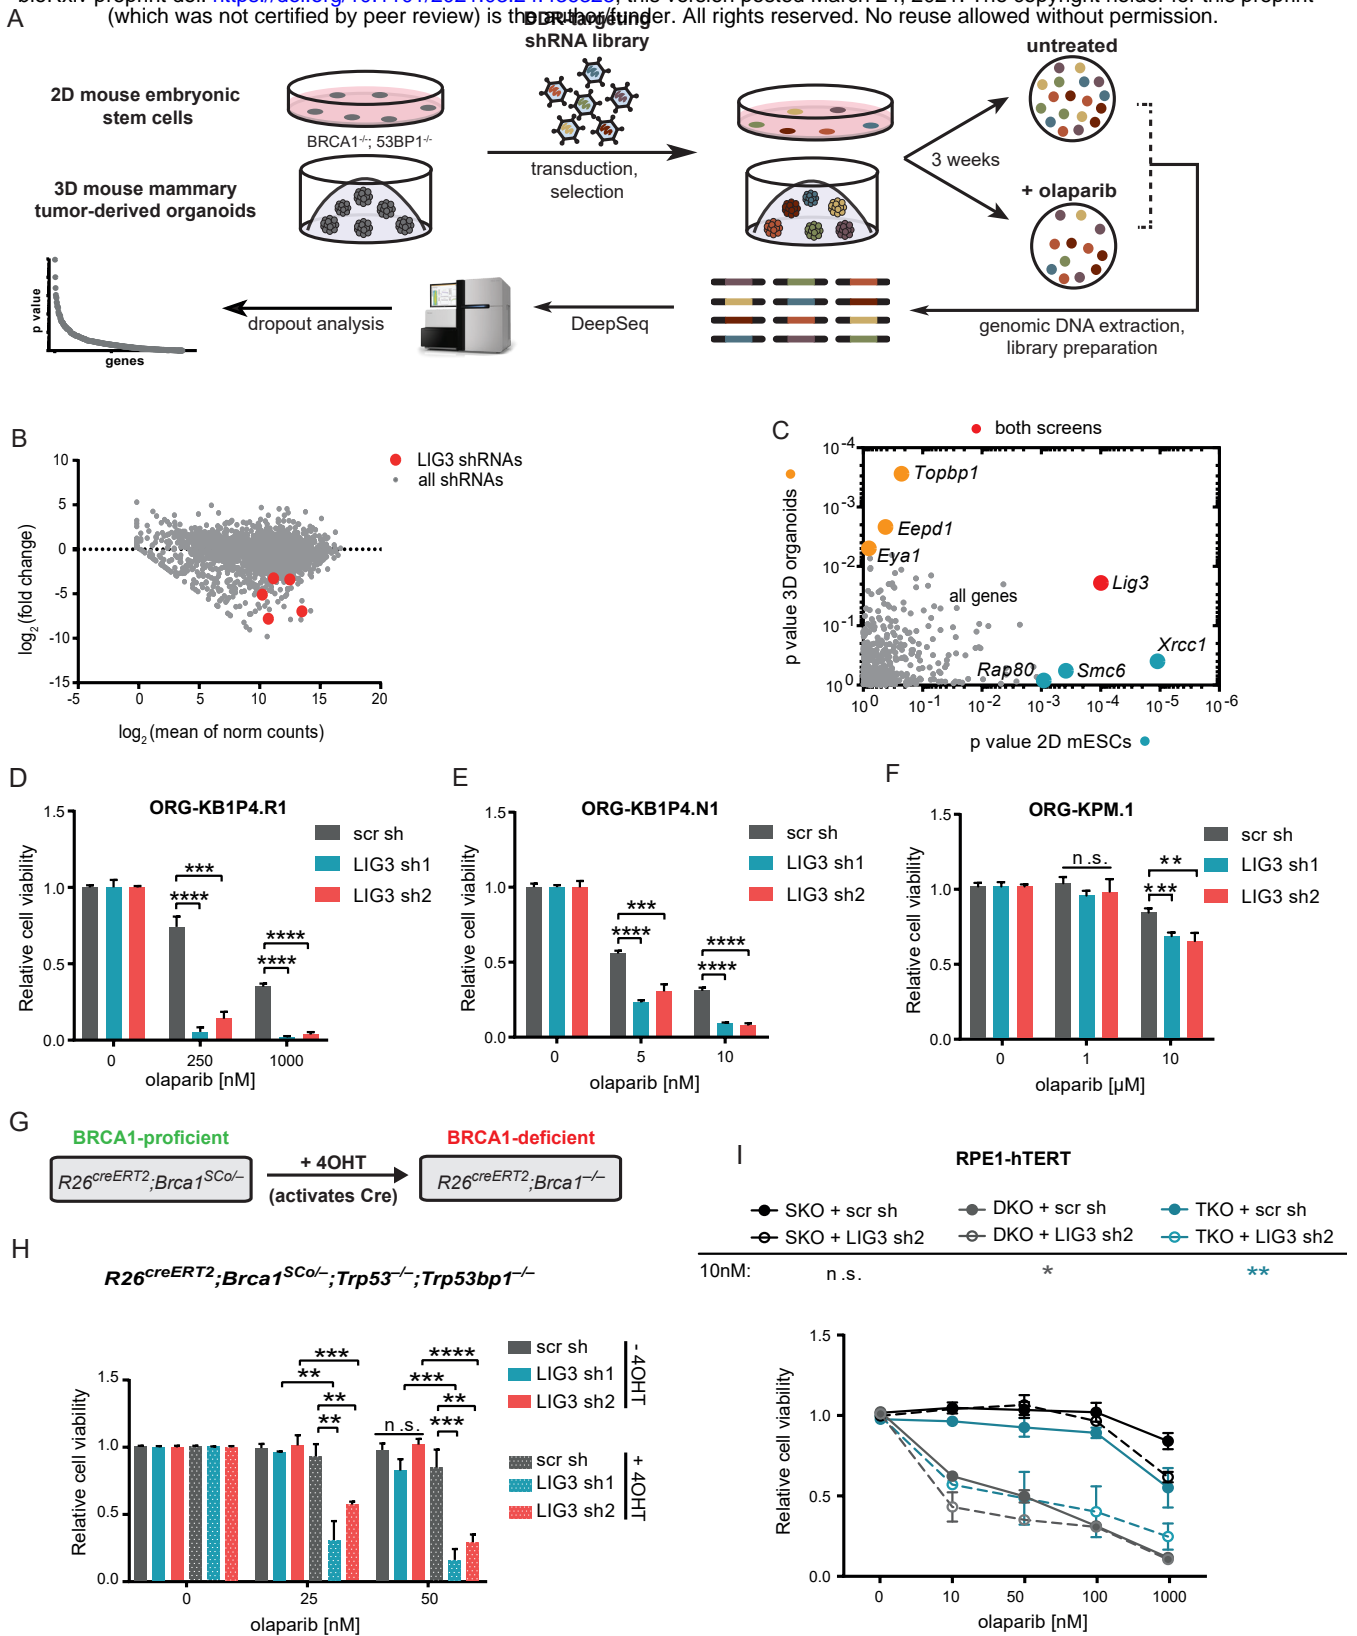

## Depletion of LIG3 Increases Sensitivity to PARPi in BRCA1-deficient cells, Independently of 53BP1

**Loss.** (A) Outline of the functional shRNA-based dropout screens. The screens were carried out at an olaparib concentration of 25nM and 50nM for *Brca1*<sup>-/-</sup>, *Trp53*<sup>-/-</sup>, *Trp53bp1*<sup>-/-</sup> mES cells (mESCs) and KB1P4.R1 organoids, respectively. (B) Log ratio (fold change) versus abundance (mean of norm counts) plot representing the screening outcome in mouse embryonic stem cells (mESCs) treated with olaparib and analyzed by MAGeCK. (C) Comparison of the screening outcome between indicated cell lines, p-value by MAGeCK. (D) Quantification of long-term clonogenic assay with ORG-KB1P4.R1, (E) ORG-KB1P4.N1, and (F) ORG-KPM.1 organoids treated with olaparib or untreated. (G) Schematic representation of *Brca1* selectable conditional allele. In addition to a *Brca1*<sup>Δ5-13</sup> null allele, these cells contain a *Brca1* Selectable Conditional knockout allele, *Brca1*<sup>SCo</sup>, in which exons 5 and 6 are flanked by loxP recombination sites. Incubation of these cells with 4-hydroxytamoxifen (4OHT) induces a CreERT2 recombinase fusion protein, resulting in nearly complete switching of the *Brca1*<sup>SCo</sup> allele and consequent loss of BRCA1 protein expression (H) Quantification of long-term clonogenic assay with *R26*<sup>creERT2</sup>;*Brca1*<sup>SCo/-</sup>;*Trp53*<sup>-/-</sup>;*Trp53bp1*<sup>-/-</sup> mESCs treated with olaparib, with and without treatment with 4OHT. See also Figure S2. (I) Quantification of long-term clonogenic assay in RPE1-hTERT TP53<sup>-/-</sup> (SKO), RPE1-hTERT TP53<sup>-/-</sup>;*BRCA1*<sup>-/-</sup> (DKO) and RPE1-hTERT TP53<sup>-/-</sup>;*BRCA1*<sup>-/-</sup>;*TP53BP1*<sup>-/-</sup> (TKO); treated with olaparib. See also figure S2. Data are represented as mean ± SD. \*\*p<0.01, \*\*\*p<0.001, \*\*\*\*p<0.0001, n.s., not significant; two-tailed t test.



**FIGURE 2**

bioRxiv preprint doi: <https://doi.org/10.1101/2021.03.24.436323>; this version posted March 24, 2021. The copyright holder for this preprint (which was not certified by peer review) is the author/funder. All rights reserved. No reuse allowed without permission.

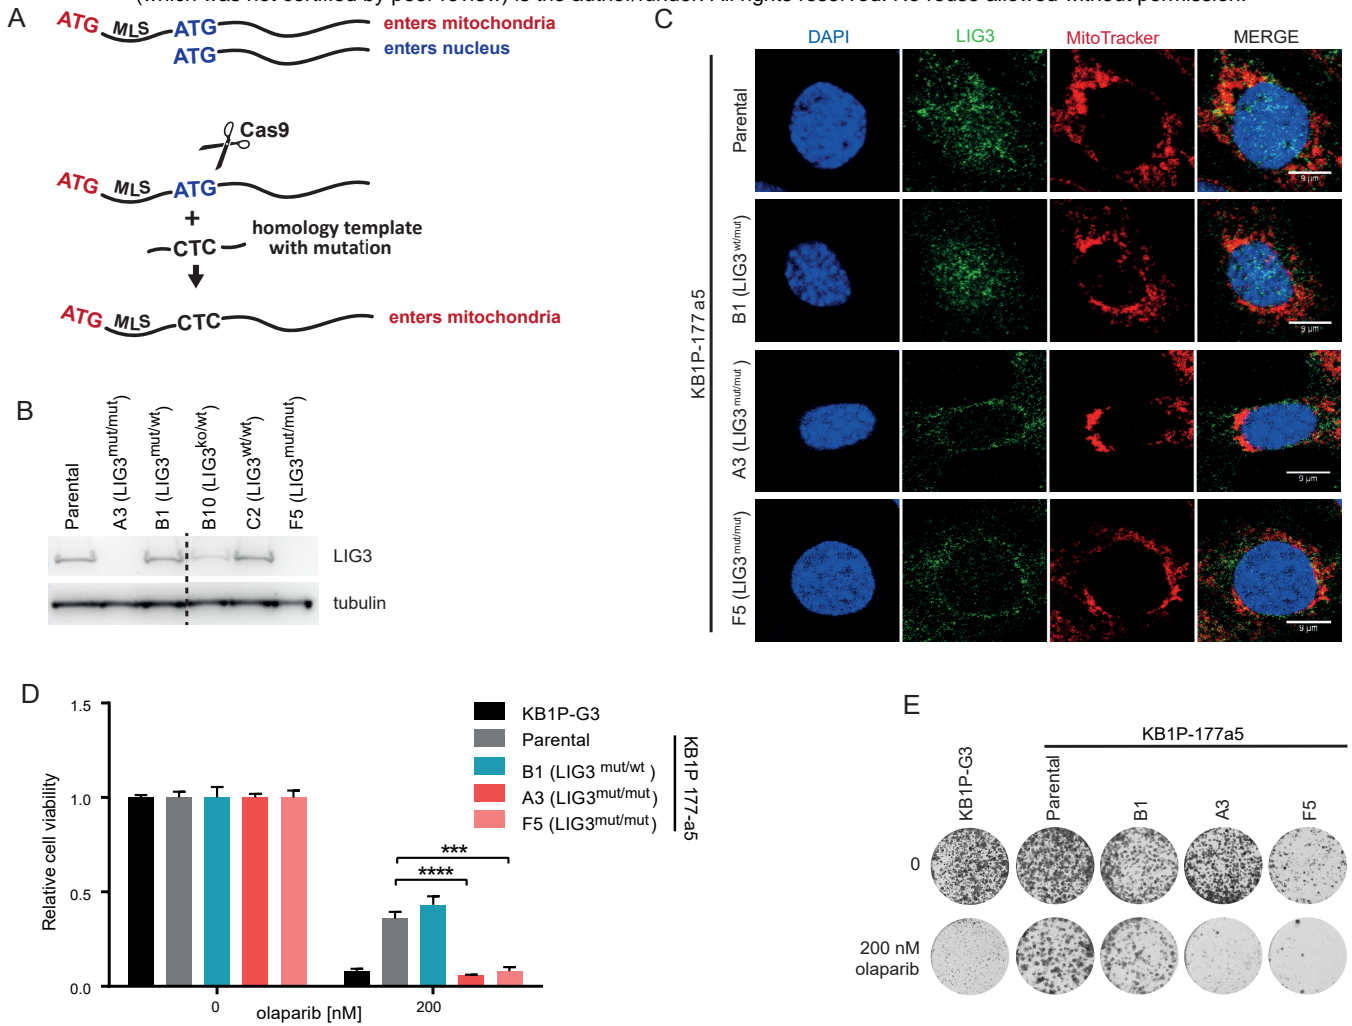

**Resistance to PARPi in *Brca1*<sup>-/-</sup>; *Trp53bp1*<sup>-/-</sup> cells is Mediated by Nuclear LIG3.** (A) Schematic representation of the generation of nuclear mutants. LIG3 gene contains two translation initiation ATG sites. The sequence flanked by both ATG sites functions as a mitochondrial targeting sequence. If translation is initiated at the upstream ATG site, a mitochondrial protein is produced, whereas translation initiated at the downstream ATG site produces the nuclear form. Ablation of the nuclear ATG allows cells to retain mitochondrial LIG3 function, but not nuclear function. CRISPR/Cas9 system was used to introduce in-frame ATG>CTC mutation in the nuclear ATG through the delivery of an homology repair template. (B) Immunoblot of LIG3 in whole cell lysates of KB1P-177a5, parental, heterozygous and homozygous mutants. (C) Immunostaining of LIG3 together with MitoTracker staining to examine the subcellular localization of LIG3 in mutant cells. (D) Quantification and (E) representative images of long-term clonogenic assay with KB1P-G3, KB1P-177a5, parental and mutant cells, treated with olaparib or untreated. Data are represented as mean ± SD. \*\*\*p<0.001, \*\*\*\*p<0.0001; two-tailed t test

### FIGURE 3

bioRxiv preprint doi: <https://doi.org/10.1101/2021.03.24.436323>; this version posted March 24, 2021. The copyright holder for this preprint (which was not certified by peer review) is the author/funder. All rights reserved. No reuse allowed without permission.

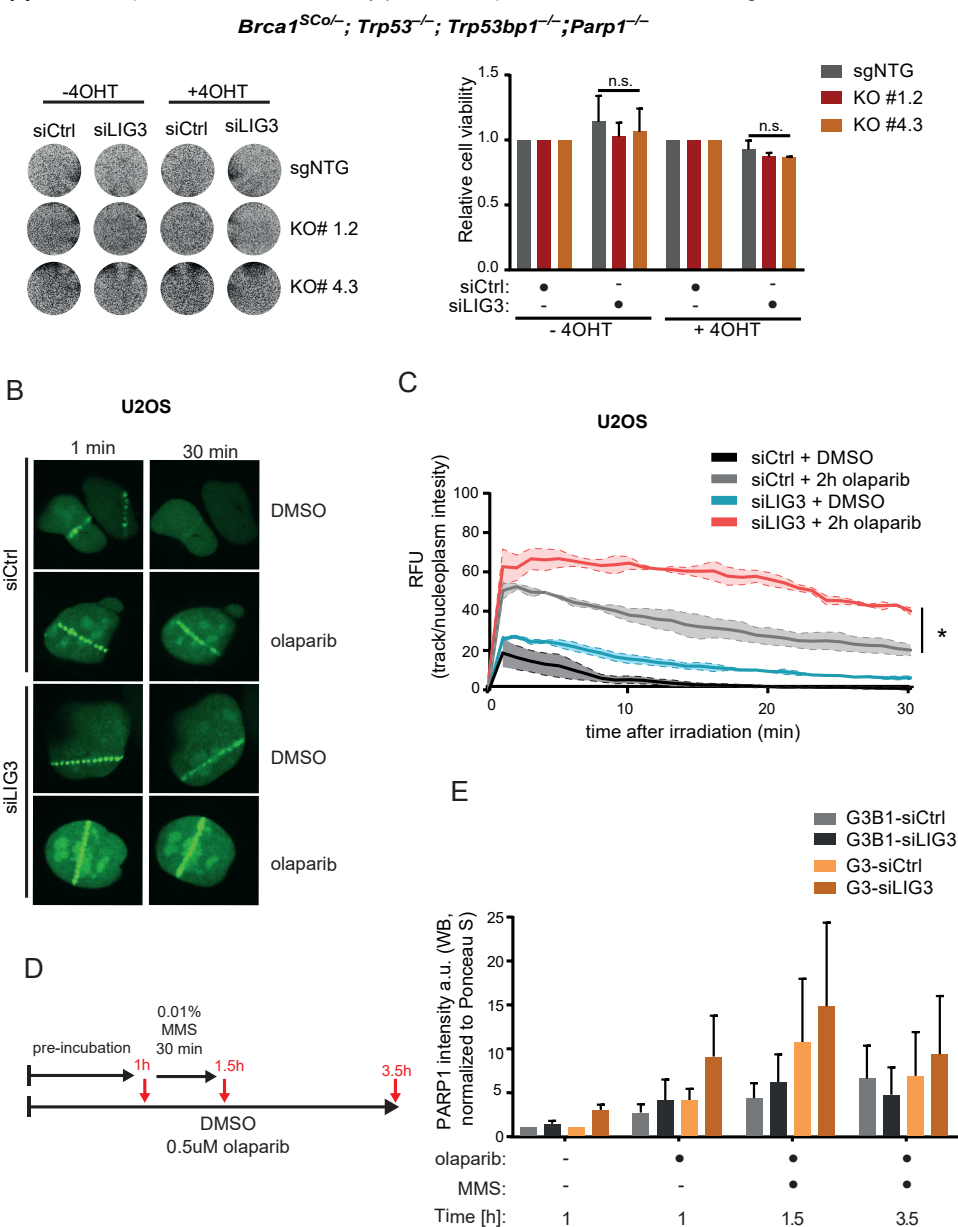

**PARP1 Trapping Contributes to PARPi Toxicity in LIG3-Depleted cells. (A)** Representative images (left panel) and quantification (right panel) of viability assay after siRNA-mediated depletion of LIG3 in *R26<sup>creERT2</sup>; Brca1<sup>SCo/-</sup>; Trp53<sup>-/-</sup>; Trp53bp1<sup>-/-</sup>; Parp1<sup>-/-</sup>* mESCs clones, with and without treatment with 4OHT. **(B)** Representative images and **(C)** quantification of analysis of PARP1 recruitment kinetics to micro-irradiated tracks in U2OS PARP1-GFP cells, following the indicated treatments. **(D)** Experimental outline and **(E)** quantification of immunoblot analysis of PARP1 in chromatin-bound fractions, upon LIG3 depletion, in KB1P-G3B1 and KB1P-G3 cells. Cells were pre-incubated with 0.5 $\mu$ M olaparib for 1 hr; and then exposed to the same treatment but in the presence of 0.01% MMS for 30 min; following incubation with MMS cells were further incubated with olaparib for 2 hr. Data are represented as mean  $\pm$  SD. \* $p < 0.05$ , \*\*\* $p < 0.001$ , \*\*\*\* $p < 0.0001$ ; n.s., not significant; two-tailed t test.

# FIGURE 4

bioRxiv preprint doi: <https://doi.org/10.1101/2021.03.24.436323>; this version posted March 24, 2021. The copyright holder for this preprint (which was not certified by peer review) is the author/funder. All rights reserved. No reuse allowed without permission.

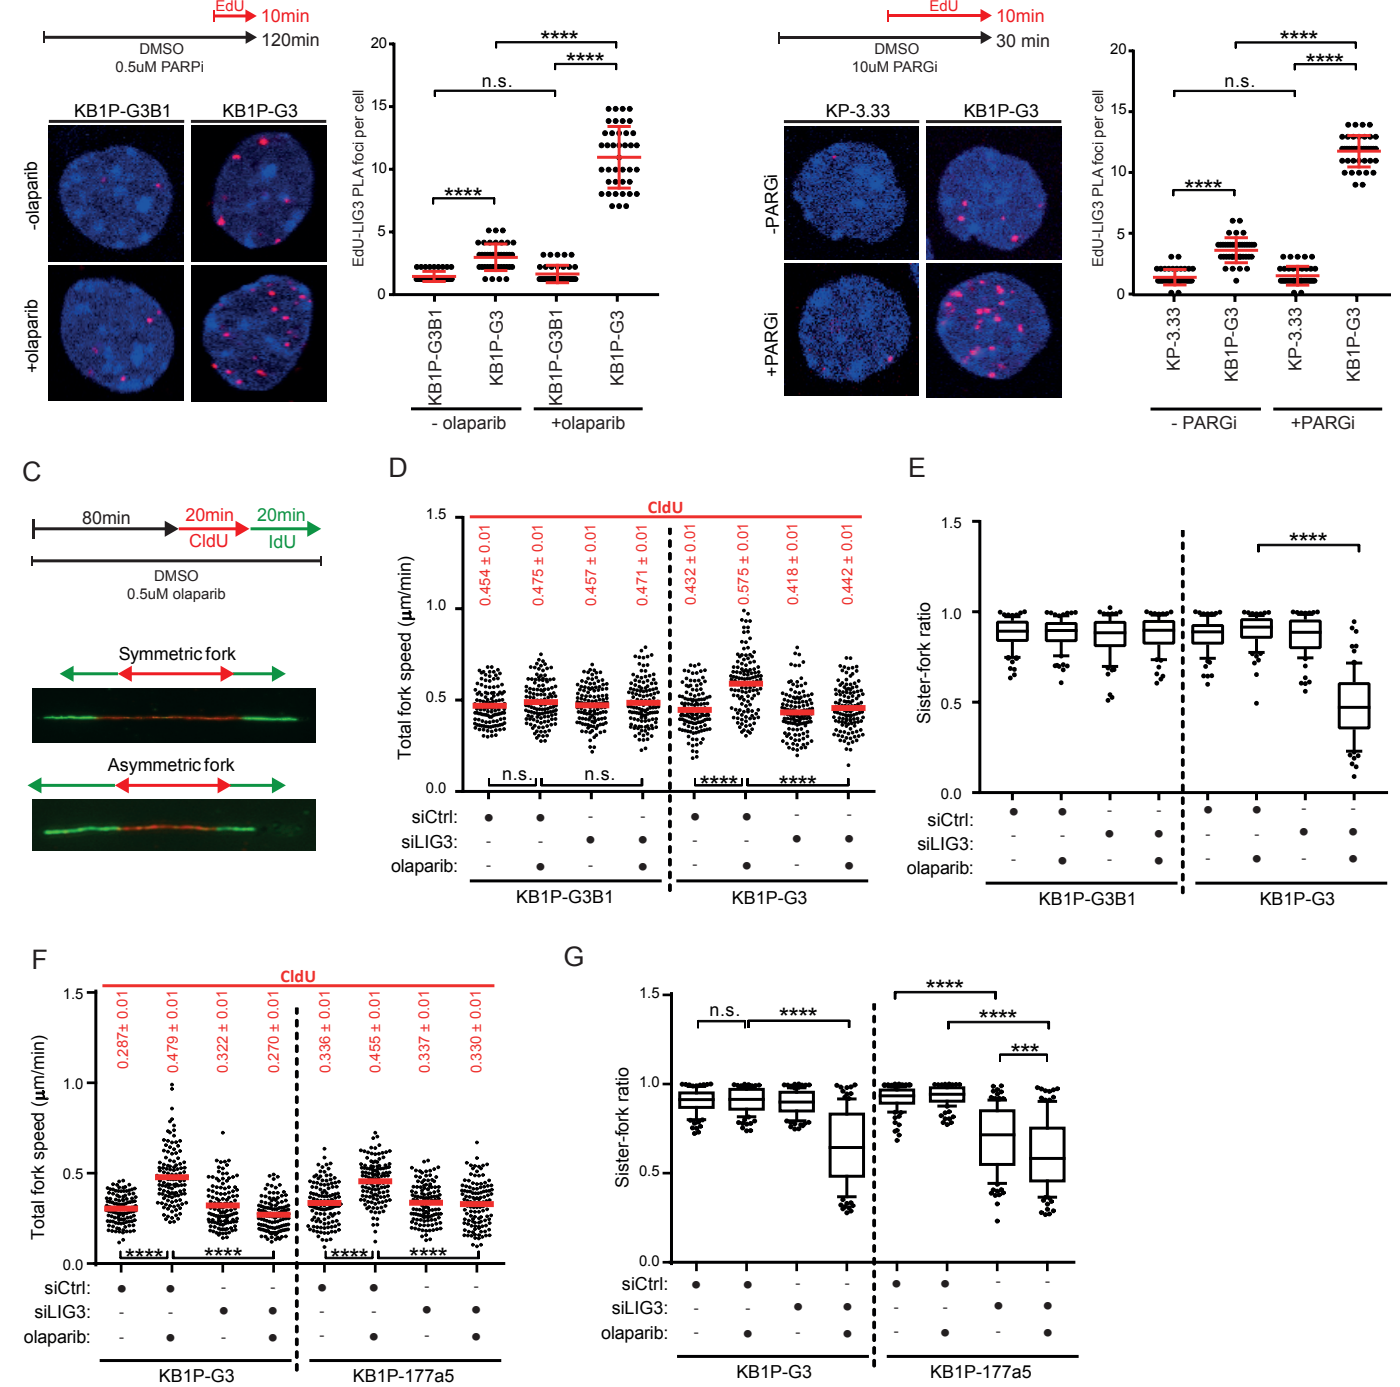

**LIG3 is Required for PARPi-induced Increase in Fork Speed in BRCA1-Deficient Cells.** (A) Outline of experimental set up, representative images and quantification of PLA between LIG3 and EdU, in KB1P-G3B1 and KB1P-G3 cells incubated for 10 min with 20 $\mu$ M EdU, in the absence or presence of 0.5 $\mu$ M olaparib. (B) Outline of experimental set up, representative images and quantification of Proximity Ligation assay (PLA) between LIG3 and EdU, in KP-3.33 and KB1P-G3 cells incubated for 10 min with 20 $\mu$ M EdU, in the absence or presence of PARG. (C) Outline of DNA fiber assay experimental set up and representative images of DNA replication forks. Cells were pre-incubated with 0.5 $\mu$ M olaparib for 80 min, followed by sequential labelling with CldU (red) and IdU (green) in the presence of olaparib for 40min. Progression was measured by tract lengths of CldU and IdU in micrometers ( $\mu$ M) (D) Quantification of fork speed in CldU tracks, following the indicated treatments, in KB1P-G3B1 and KB1P-G3 cells. See also figure S3. (E) Quantification of fork symmetry following the indicated treatments, in KB1P-G3 and KB1P-G3B1 cells. (F) Quantification of fork speed in CldU tracks, following the indicated treatments, in KB1P-G3 and KB1P-177a5 cells. See also figure S3. (G) Quantification of fork symmetry following the indicated treatments, in KB1P-G3 and KB1P-177a5 cells. Data are represented as mean  $\pm$  SD, \*\*\*p<0.001 \*\*\*\*p<0.0001; n.s., not significant; Mann–Whitney U test.

# FIGURE 5

A bioRxiv preprint doi: <https://doi.org/10.1101/2021.03.24.436323>; this version posted March 24, 2021. The copyright holder for this preprint (which was not certified by peer review) is the author/funder. All rights reserved. No reuse allowed without permission.

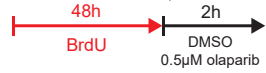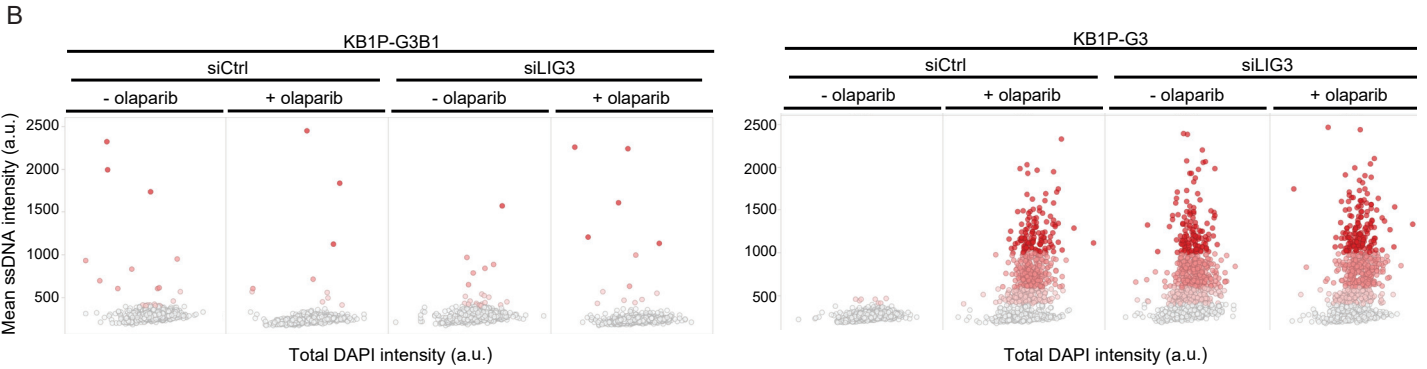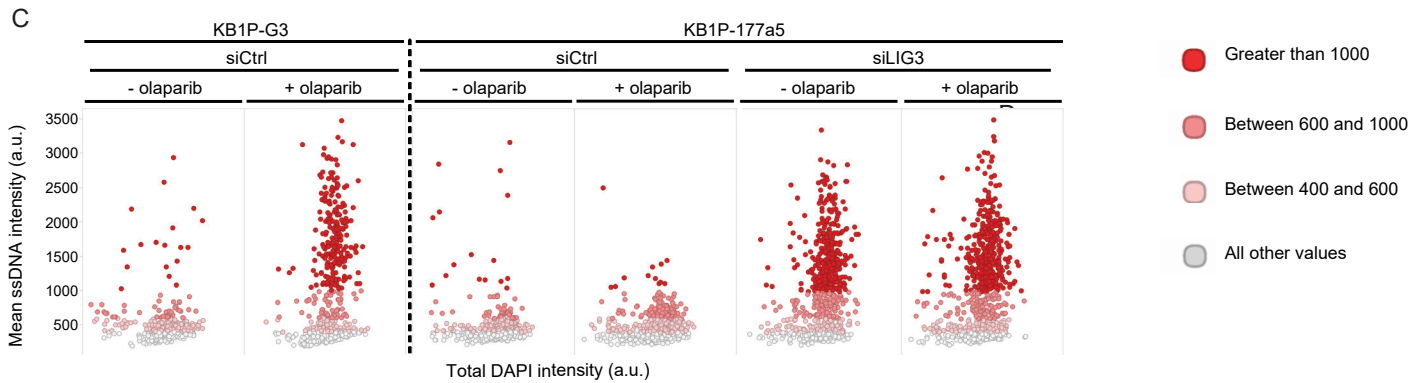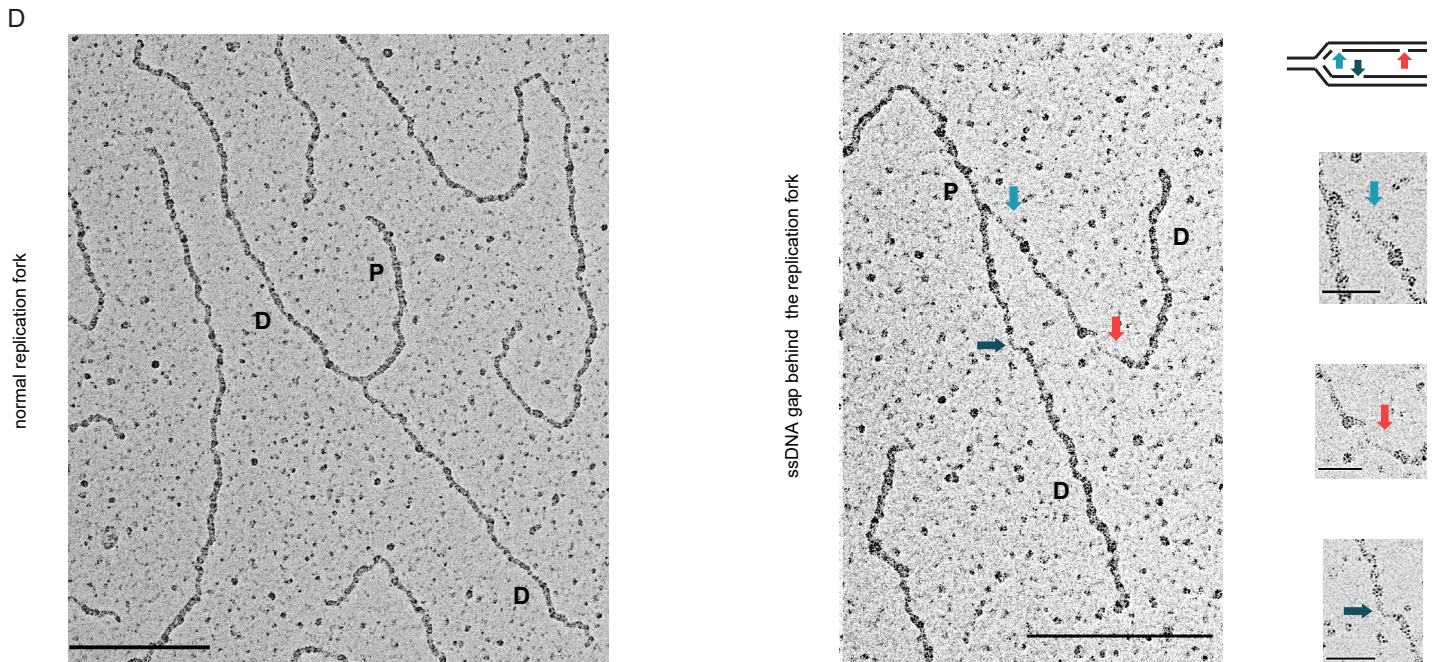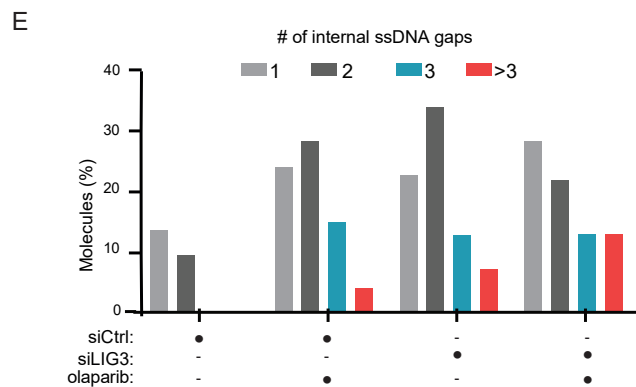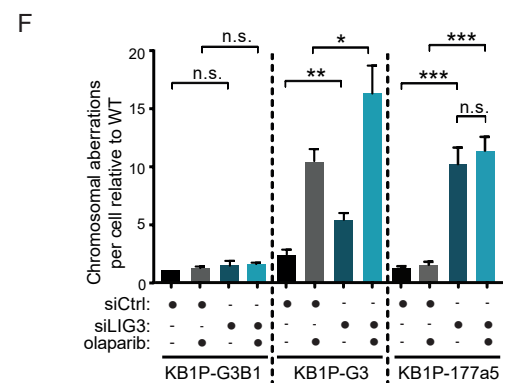

## Loss of LIG3 Leads to an increase in ssDNA Gaps and in Genomic Instability in BRCA1-Deficient Cells

**(A)** Outline of experimental setup to analyze ssDNA gaps by immunofluorescence assay. Cells were incubated with BrdU for 48 hr followed by 2 hr treatment with 0.5 $\mu$ M olaparib or left untreated. **(B)** High-content microscopy of ssDNA in KB1P-G3B1, KB1P-G3 and **(C)** KB1P-177a5 mouse tumor cells. **(D)** Representative electron micrographs and **(E)** quantification of internal ssDNA gaps behind replication fork observed upon treatment with 0.5 $\mu$ M olaparib for 2hr in KB1P-G3 cells, depleted or not of LIG3. Left panel represents a normal fork. Right panel represents a fork with internal ssDNA gaps. Big scale bar: 250nm (250nm = 1214bp); small scale bar: 50nm (50nm = 242bp). P; parental. D; daughter. **(F)** Quantification of chromosomal aberrations following 2 hr treatment with 0.5 $\mu$ M olaparib and recovery for 6 hr, in KB1P-G3B1, KB1P-G3 and KB1P-177a5 mouse tumor cells. Data are represented as mean  $\pm$  SD, \* $p$ <0.01, \*\*\* $p$ <0.001, \*\*\*\* $p$ <0.0001; n.s., not significant; two-tailed unpaired t-test.

# FIGURE 6

bioRxiv preprint doi: <https://doi.org/10.1101/2021.03.24.436323>; this version posted March 24, 2021. The copyright holder for this preprint (which was not certified by peer review) is the author/funder. All rights reserved. No reuse allowed without permission.

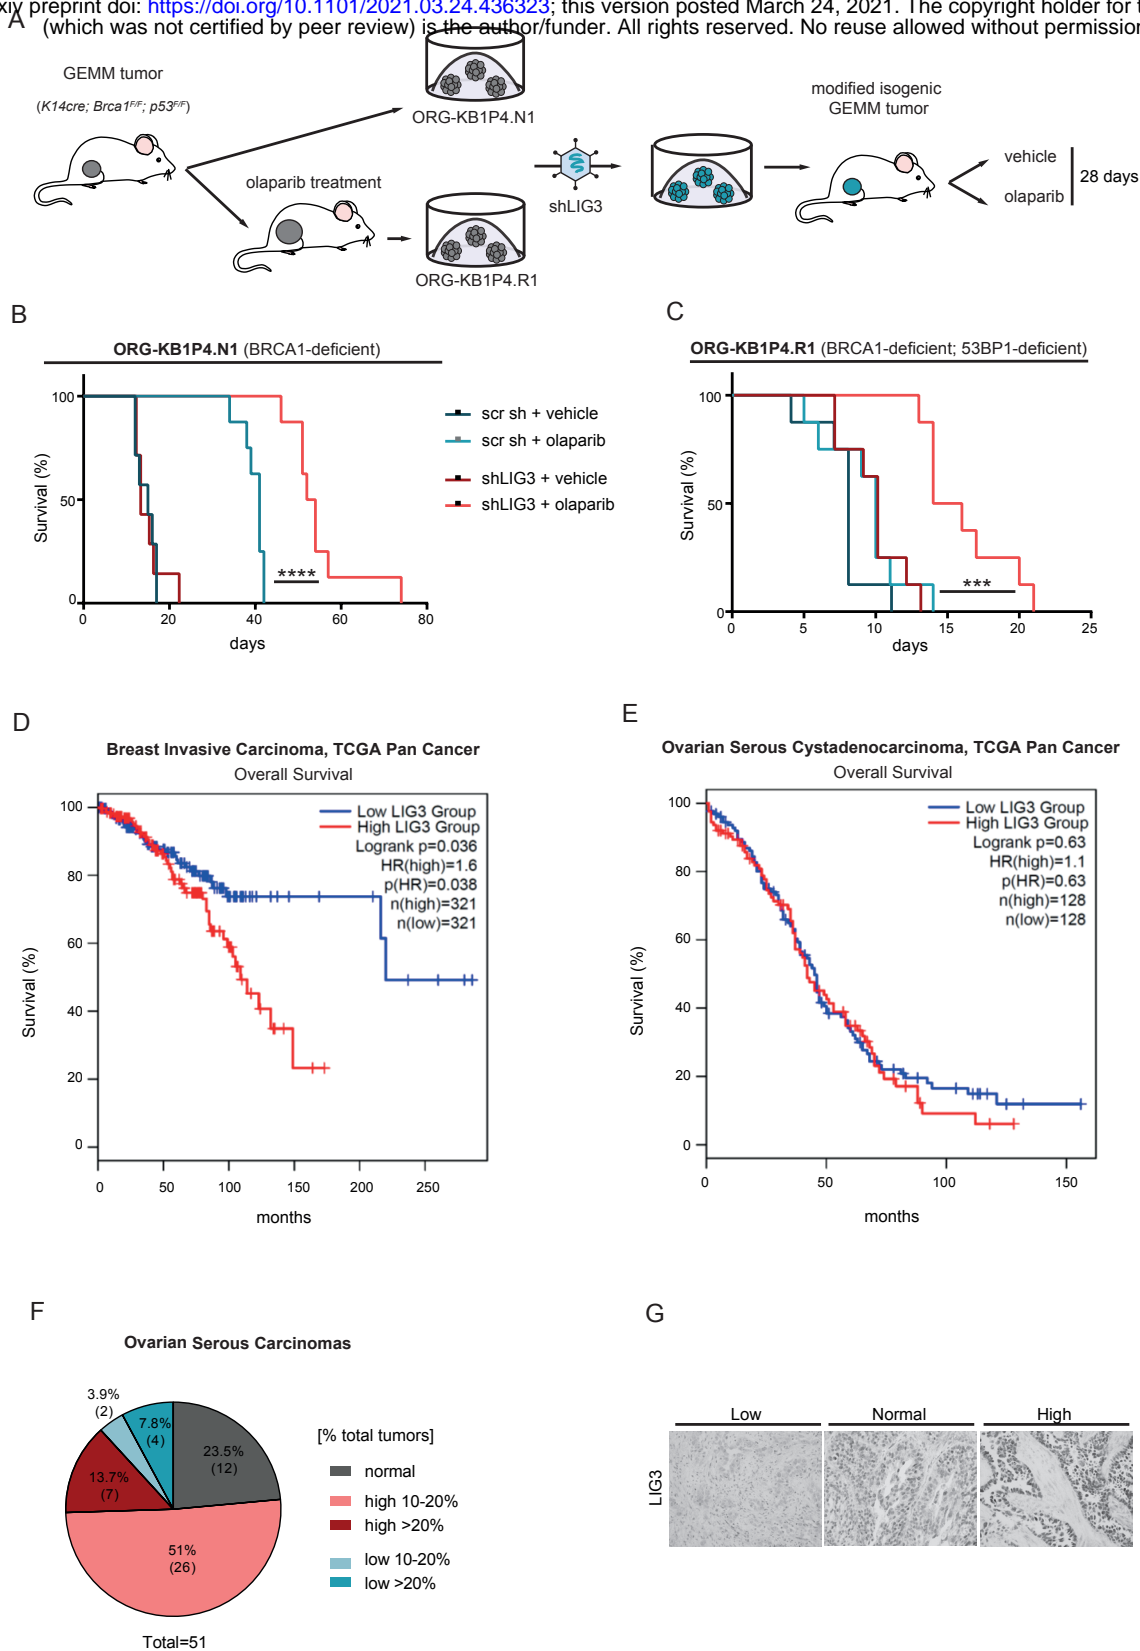

**LIG3 Depletion Increases Efficacy of Olaparib Against BRCA1-deficient Mammary Tumors in Mice and its Expression Correlates with Overall Survival in Human Breast Cancer Patients** (A) Schematic outline of *in vivo* experimental set up. Organoids were modified *in vitro* and transplanted into the mammary fat pad of syngeneic, wild-type FVB/N mice. Upon tumor outgrowth, mice were treated with olaparib or vehicle for 28 consecutive days. (B) Kaplan–Meier survival curves of mice transplanted with KB1P4.N1 or (C) KB1P4.R1 (right) organoid lines, after *in vitro* shRNA-mediated depletion of LIG3. \*\*\* $p < 0.001$ , \*\*\*\* $p < 0.0001$ ; Log-Rank (Mantel Cox). (D) Association between LIG3 expression with overall survival of TCGA breast invasive carcinoma and (E) ovarian serous cystadenocarcinoma cohorts. The two TCGA cohorts were splitted into two groups: upper 70% and lower 30% quartile expression (high vs. low expression). Statistical significance was determined using Log-Rank (Mantel Cox). (F) Summary of IHC analysis of LIG3 expression in ovarian serous carcinomas and (G) representative images of LIG3 IHC of ovarian serous carcinomas biopsies.



## FIGURE 7

bioRxiv preprint doi: <https://doi.org/10.1101/2021.03.24.436323>; this version posted March 24, 2021. The copyright holder for this preprint (which was not certified by peer review) is the author/funder. All rights reserved. No reuse allowed without permission.

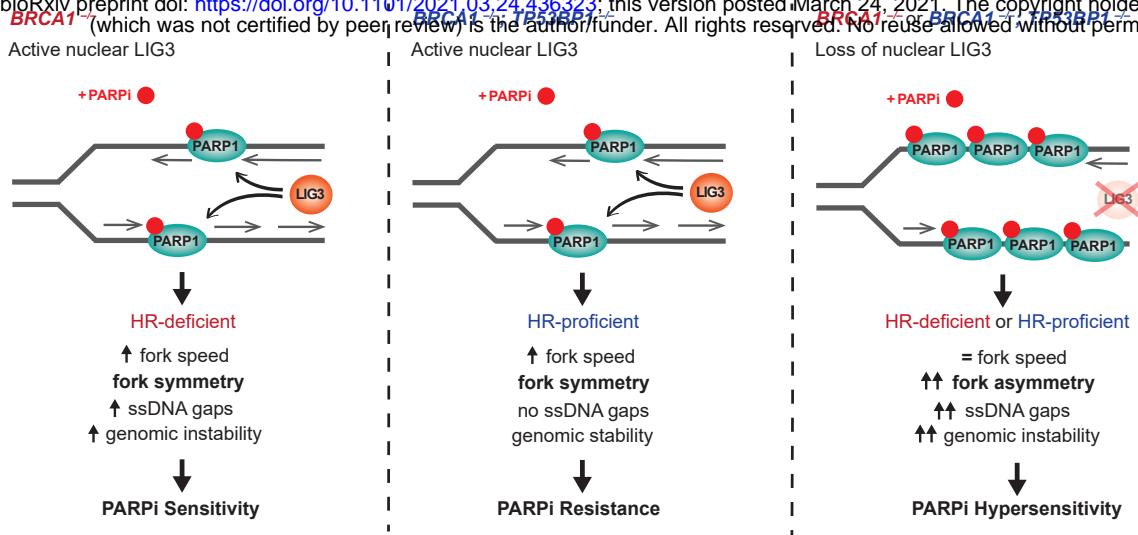

**Proposed model.** Left panel: Upon treatment with PARPi, BRCA1-deficient cells, which have loss HR activity, display a LIG3-dependent increase in fork speed. BRCA1-deficient cells display an increase in ssDNA gaps due to repriming across trapped PARP1, high levels of genomic instability compounded by HR-deficiency and ultimately, sensitivity to PARPi. Middle panel: Upon treatment with PARPi, BRCA1- and 53BP1-deficient cells, which have restored functional HR, display a LIG3-dependent increase in fork speed. These cells do not have increased numbers of ssDNA gaps, genomic instability is rescued, and are resistant to PARPi. Right panel: Upon treatment with PARPi, increased trapping of PARP1 and loss of a LIG3-dependent lesion bypass mechanism in BRCA1-deficient and BRCA1- and 53BP1-deficient cells causes frequent replication fork stalling, and results in asymmetry and increased ssDNA gaps. This in turn results in genomic instability and hypersensitization to PARPi treatment.
